# Supplementary material for: Novel Potent Hypoglycemic Compounds from Euonymus laxiflorus Champ. and Their Effect on Reducing Plasma Glucose in an ICR Mouse Model
Source: Molecules. 2018 Aug 2;23(8):1928. doi: 10.3390/molecules23081928 (PMC6222451; doi:10.3390/molecules23081928)
Supplement: Supplementary file 1 [file molecules-23-01928-s001.pdf]

## Supplementary materials:

### 1. NMR spectrums of 3 new $\alpha$ -glucosidase inhibitors isolated from methanolic extract of *Euonymus laxiflorus* Champ. trunk bark

#### 1.1. NMR spectrums of Compound 1, Walterolactone A/B $\beta$ -D-pyranoglucoside: Figure S1 – Figure S7

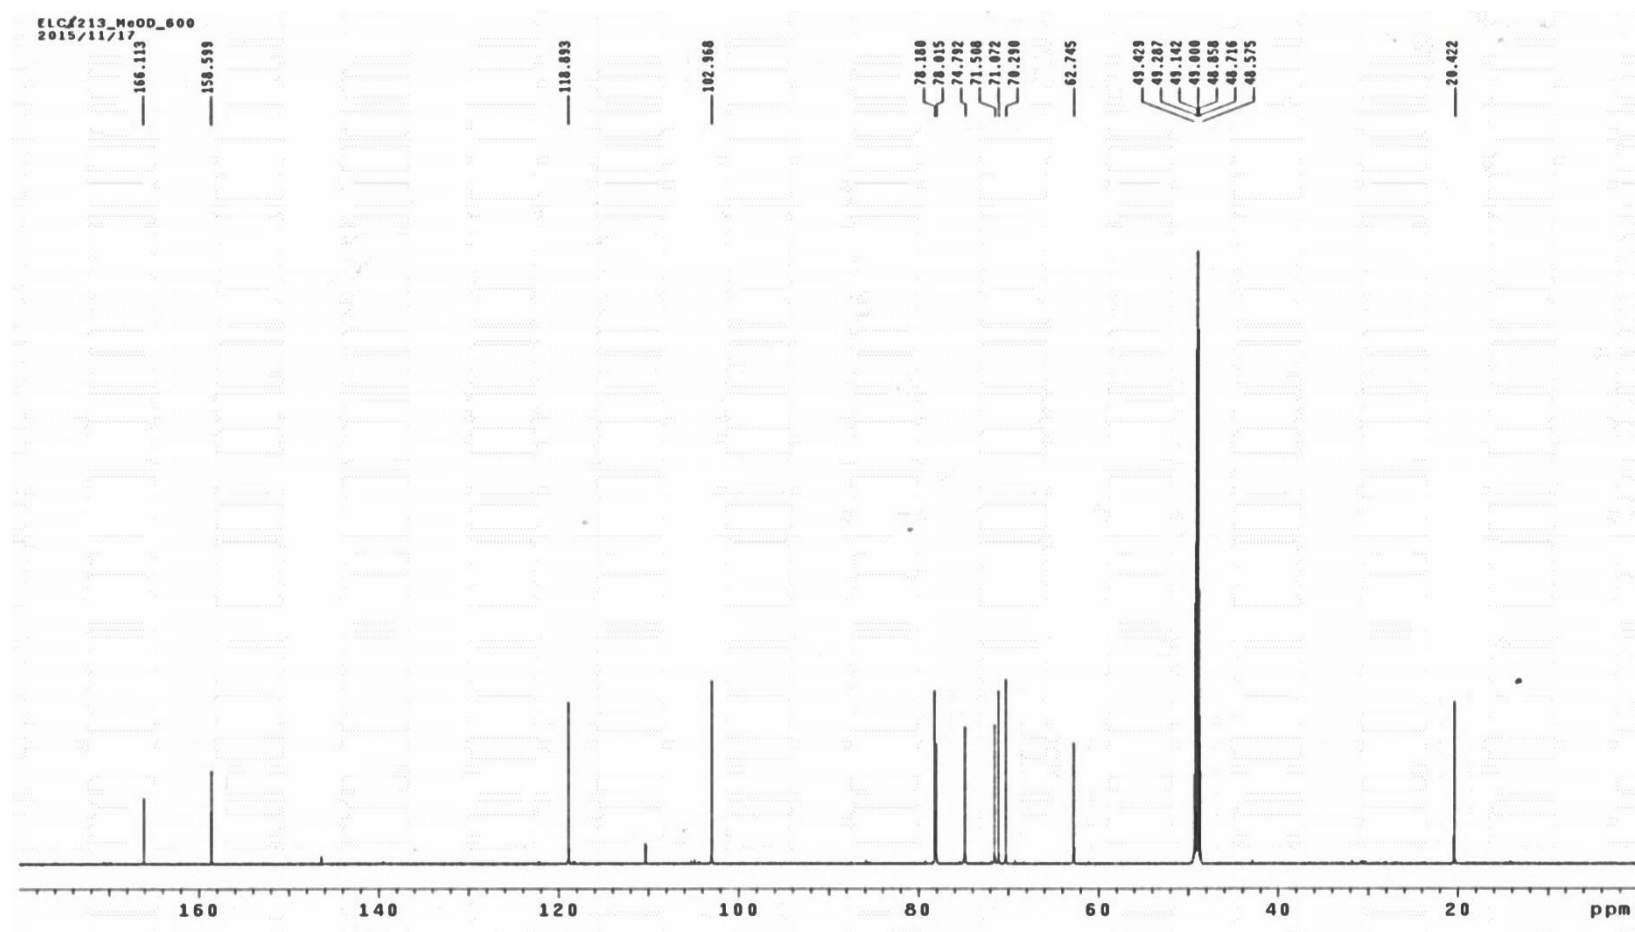

Figure S1.  $^{13}\text{C}$ -NMR spectrum of compound 1, measured in  $\text{MeOH}-d_4$  at 150 MHz

ELC213\_MeOD\_600  
2015/11/17

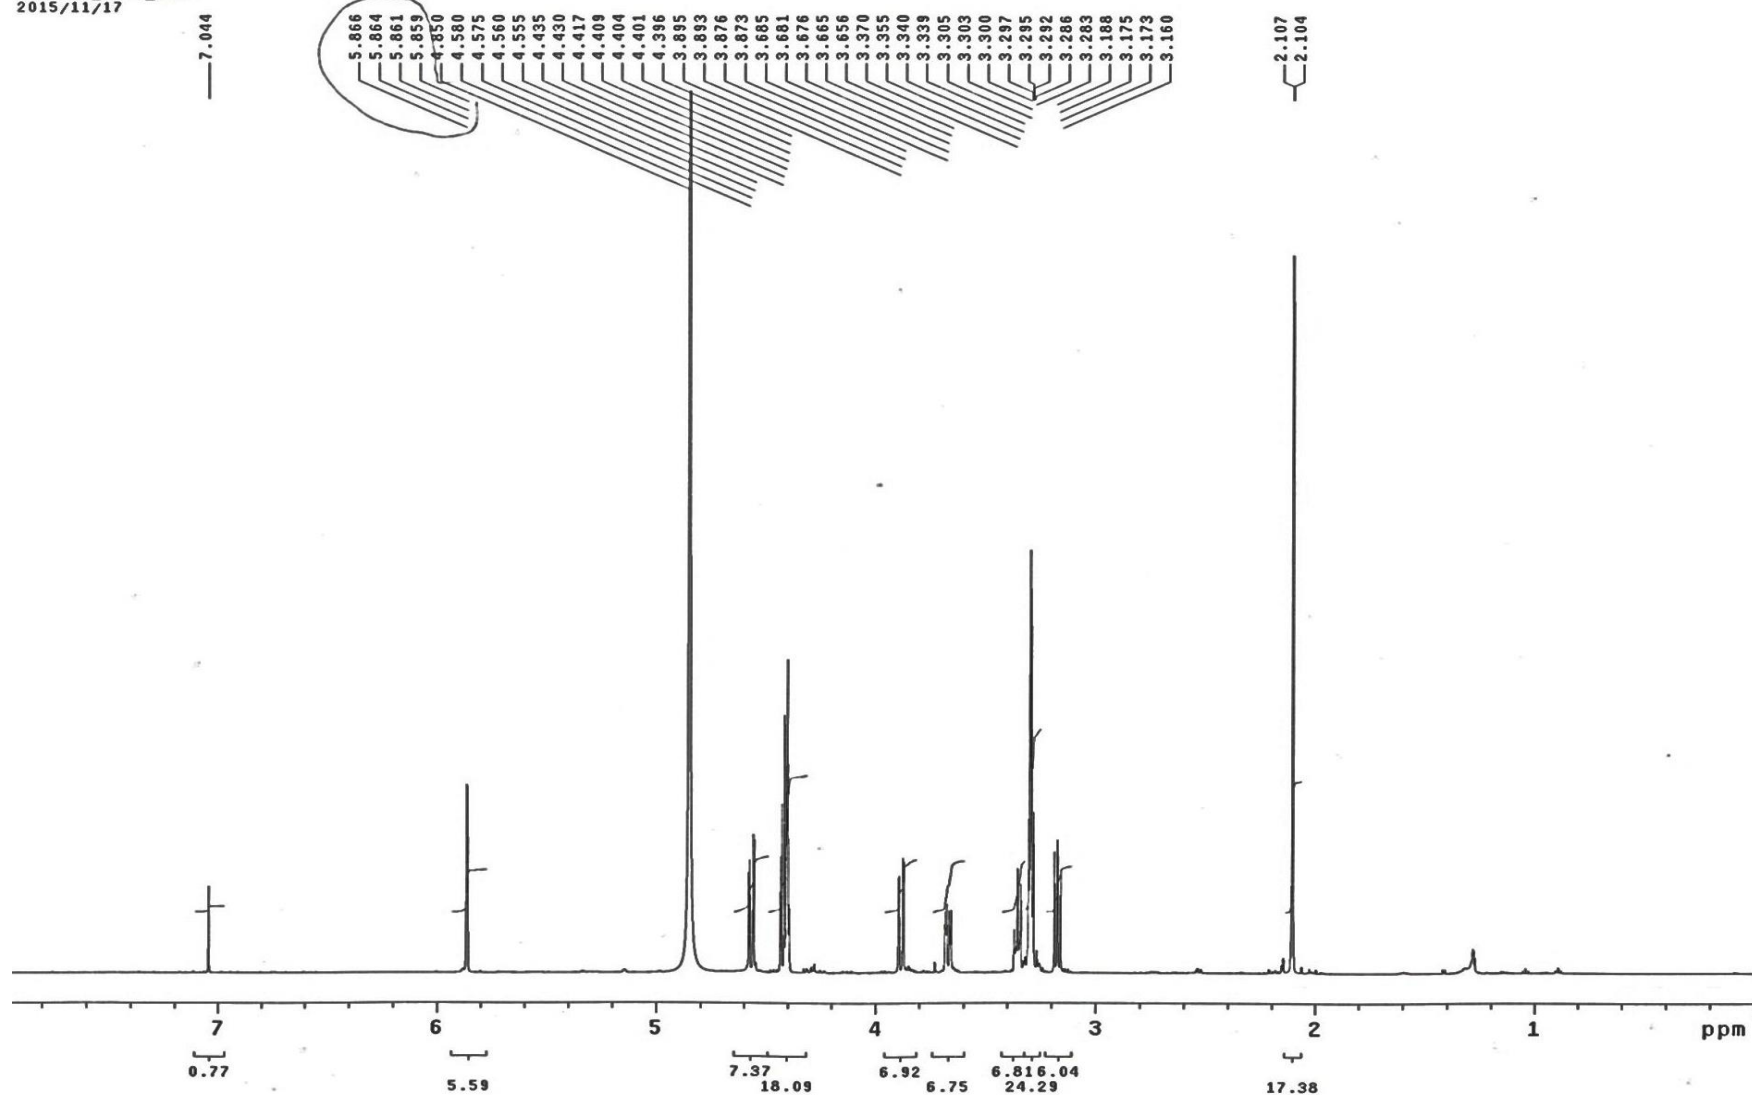

Figure S2. <sup>1</sup>H NMR spectrum of compound 1, measured in MeOH-*d*<sub>4</sub> at 600 MHz.

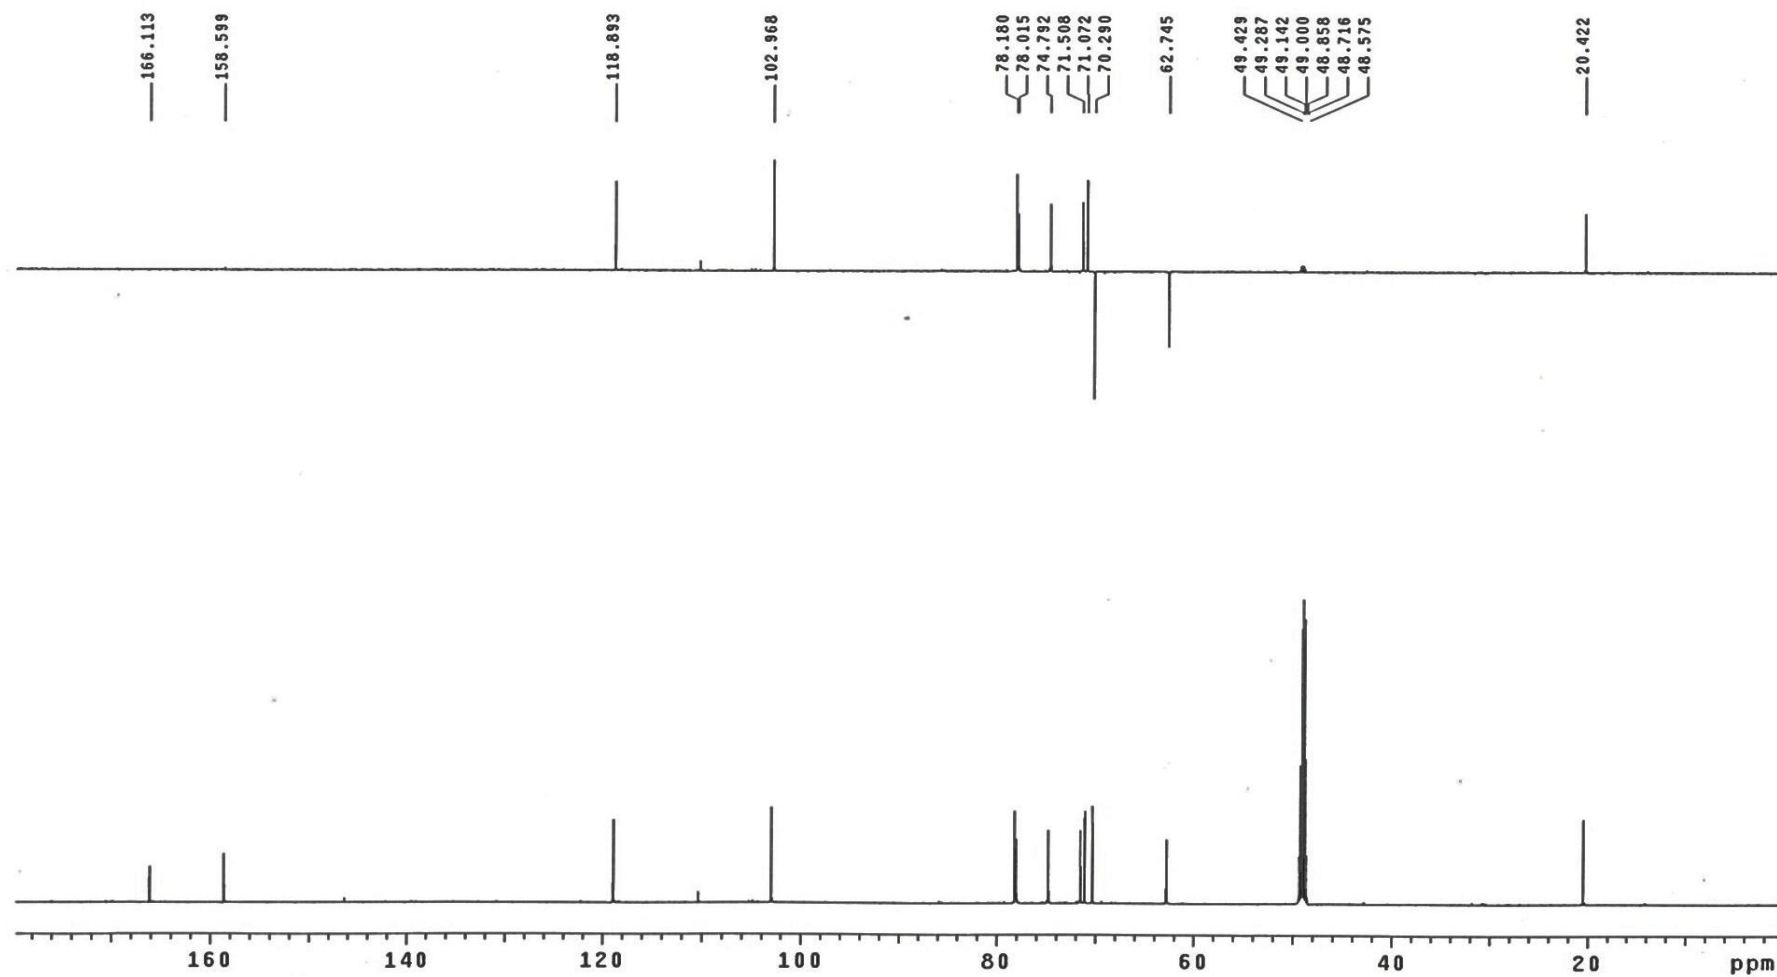

Figure S3. DEPT<sub>135</sub> spectrum of compound **1**, measured in MeOH-*d*<sub>4</sub> at 150 MHz

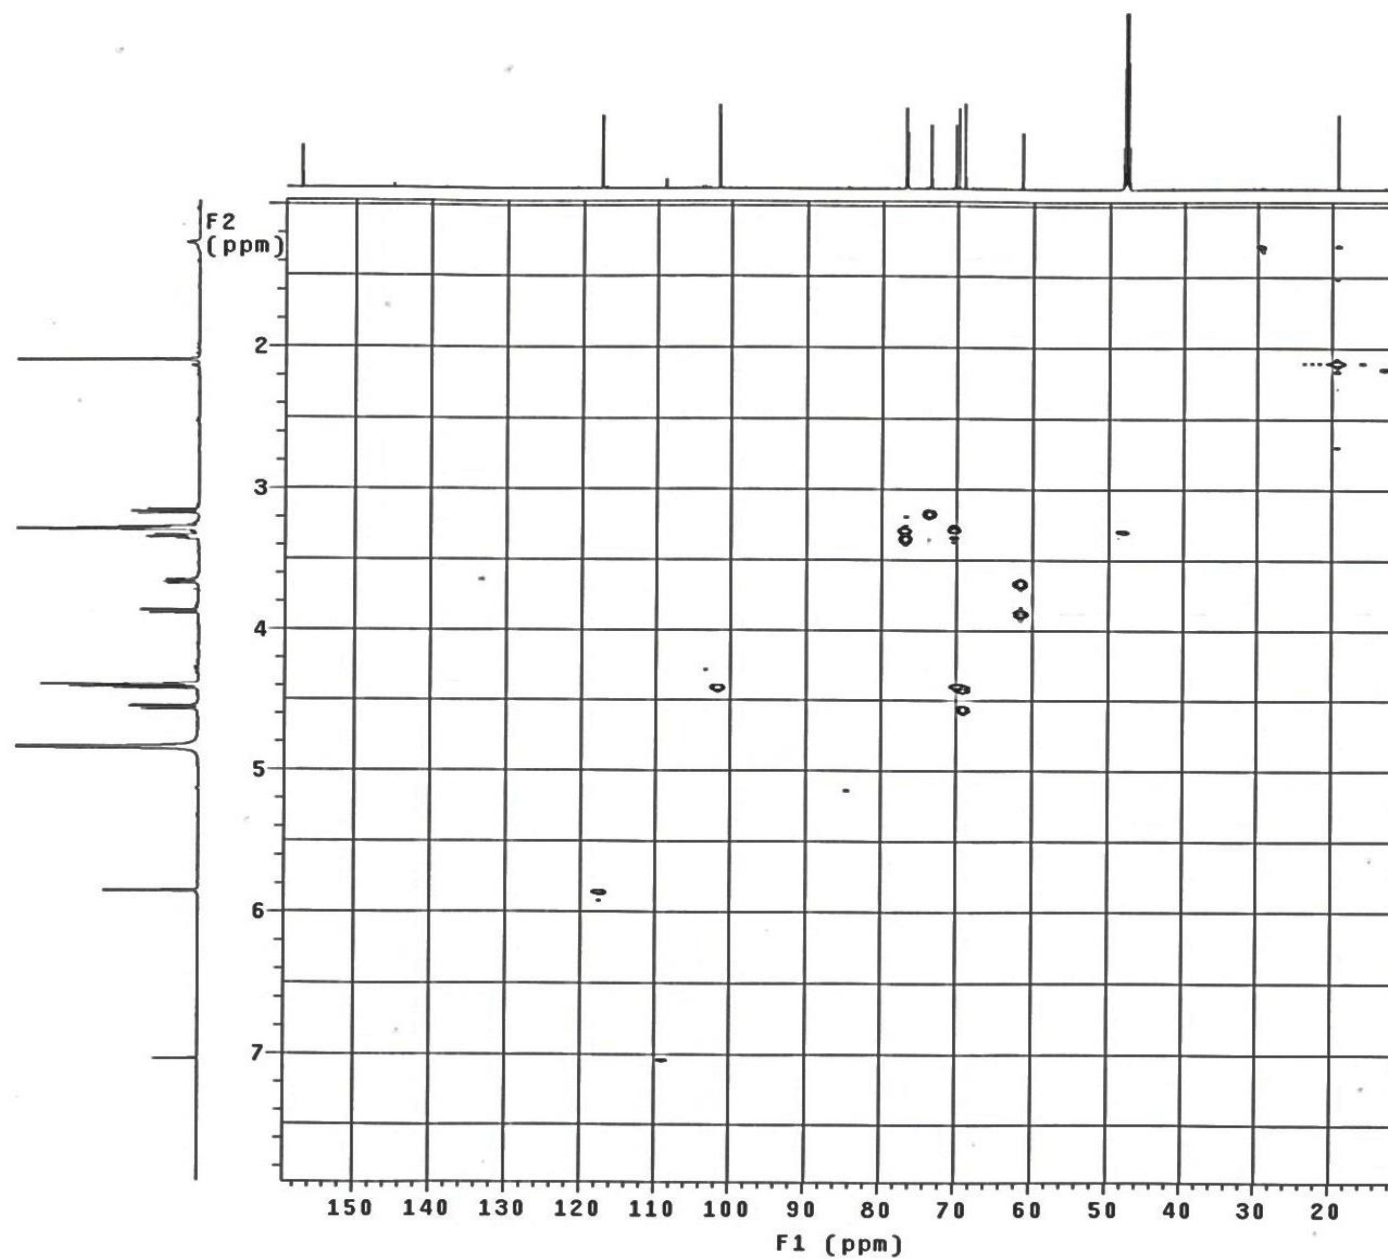

**Figure S4.** gHSQCAD spectrum of compound **1**, measured in  $\text{MeOH-}d_4$

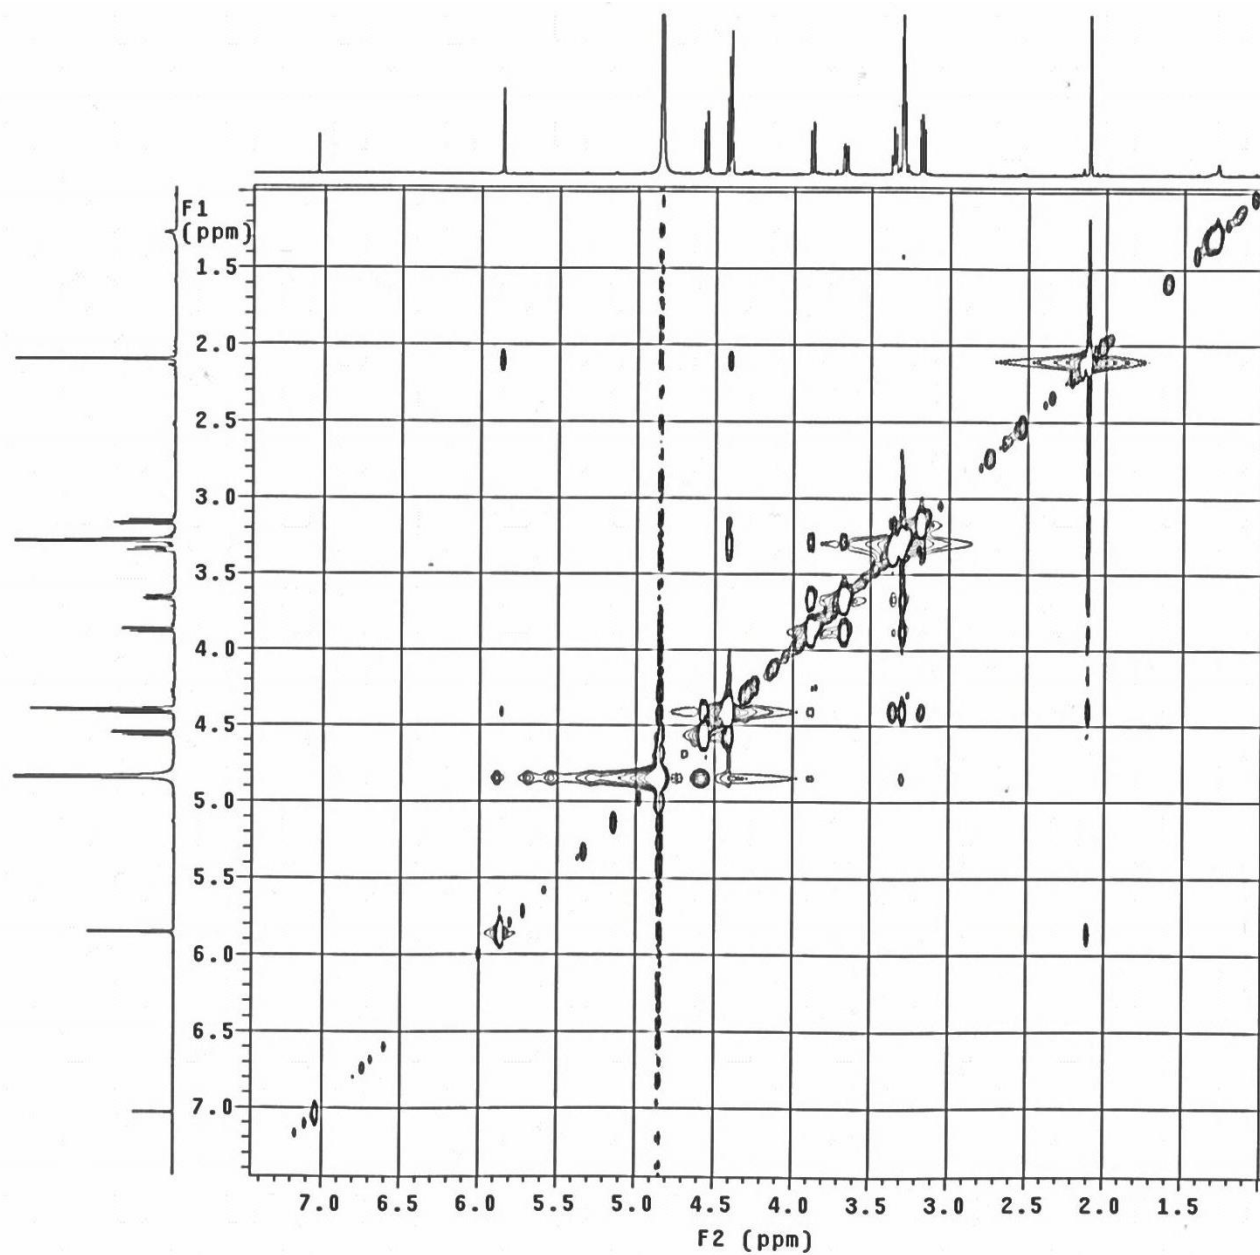

**Figure S5.** NOESY spectrum of compound **1**, measured in MeOH- $d_4$

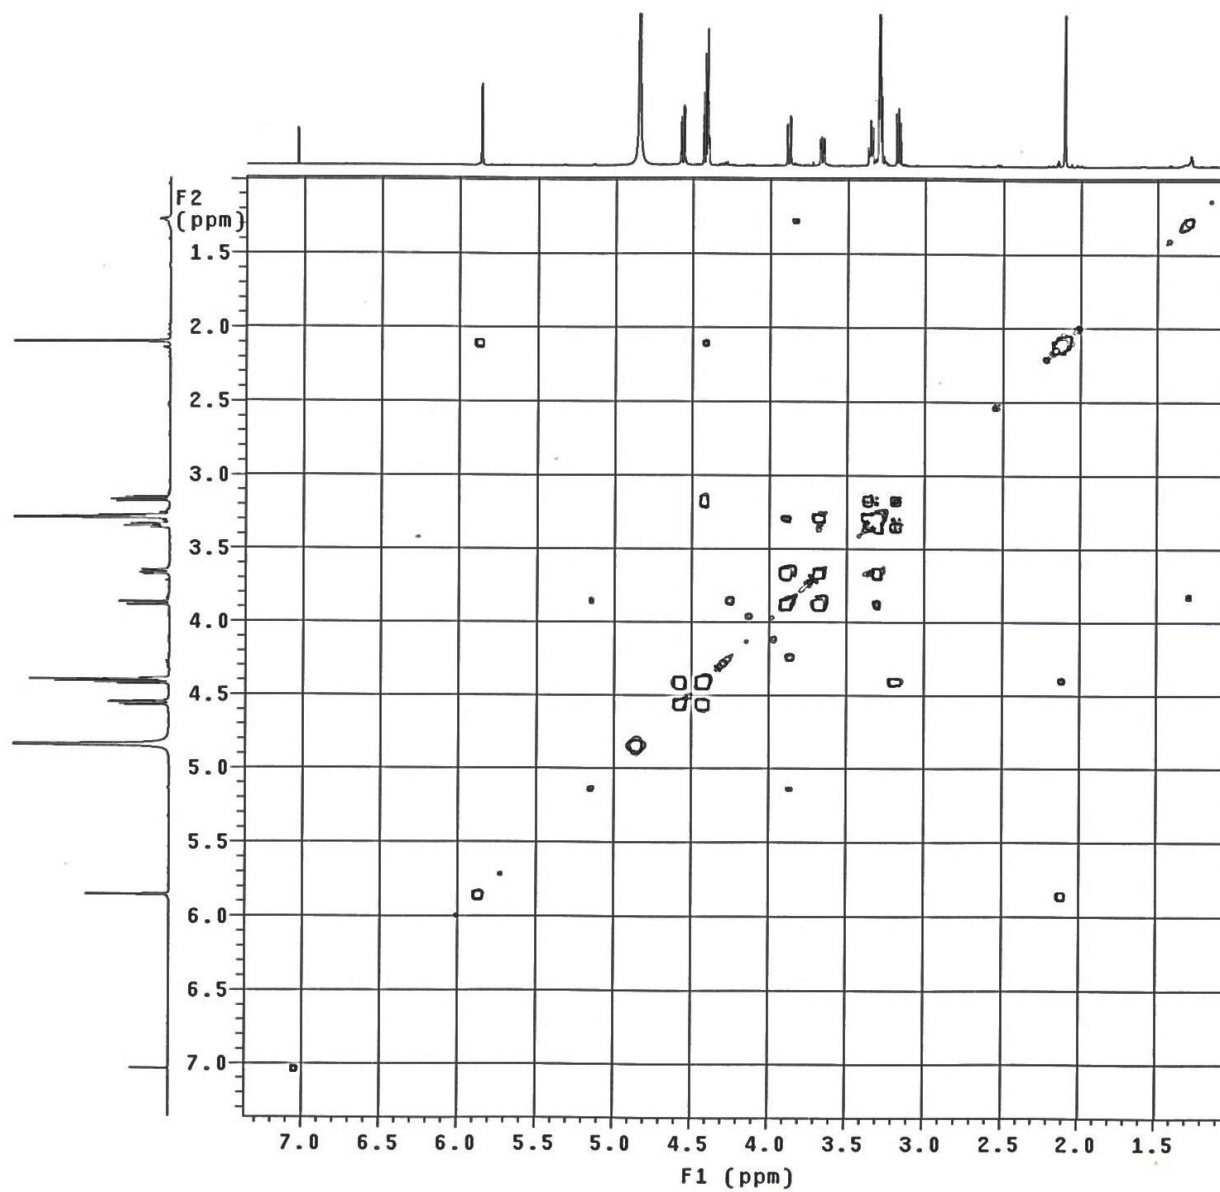

**Figure S6.** gCOSY spectrum of compound **1**, measured in MeOH-d<sub>4</sub>

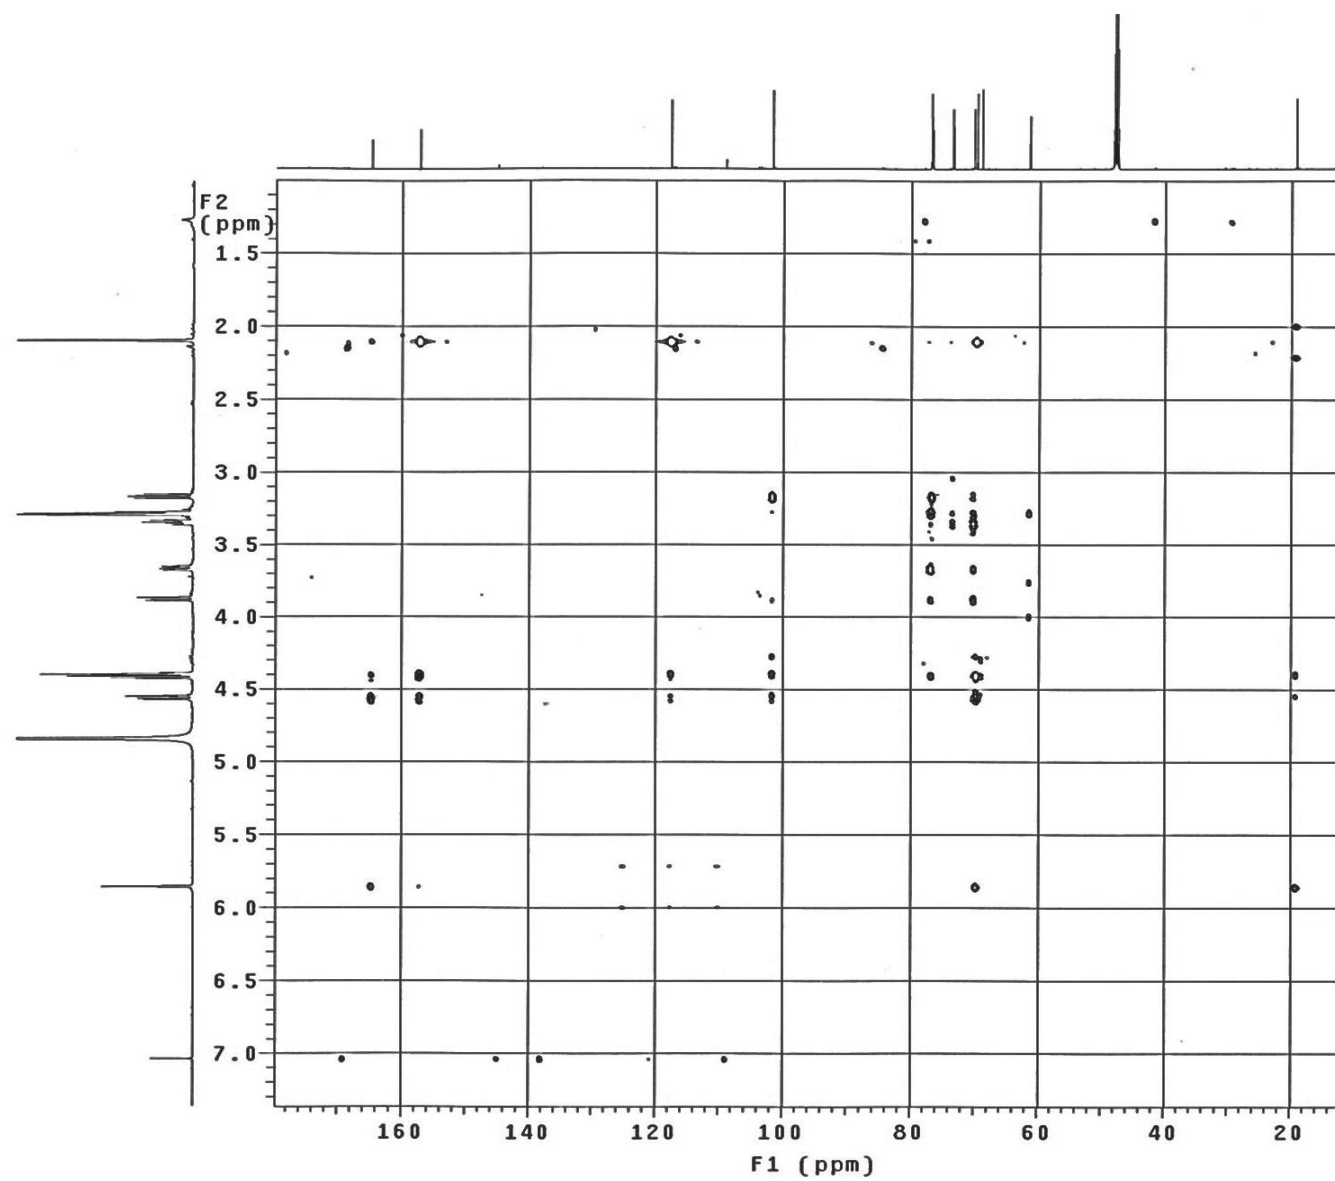

Figure S7. gHMBCAD spectrum of compound 1, measured in  $\text{MeOH-}d_4$

1.2. NMR spectra of Compound 11, Schweinfurthinol 9-*O*- $\beta$ -D-pyranoglucoside: Figure S8 – Figure S14

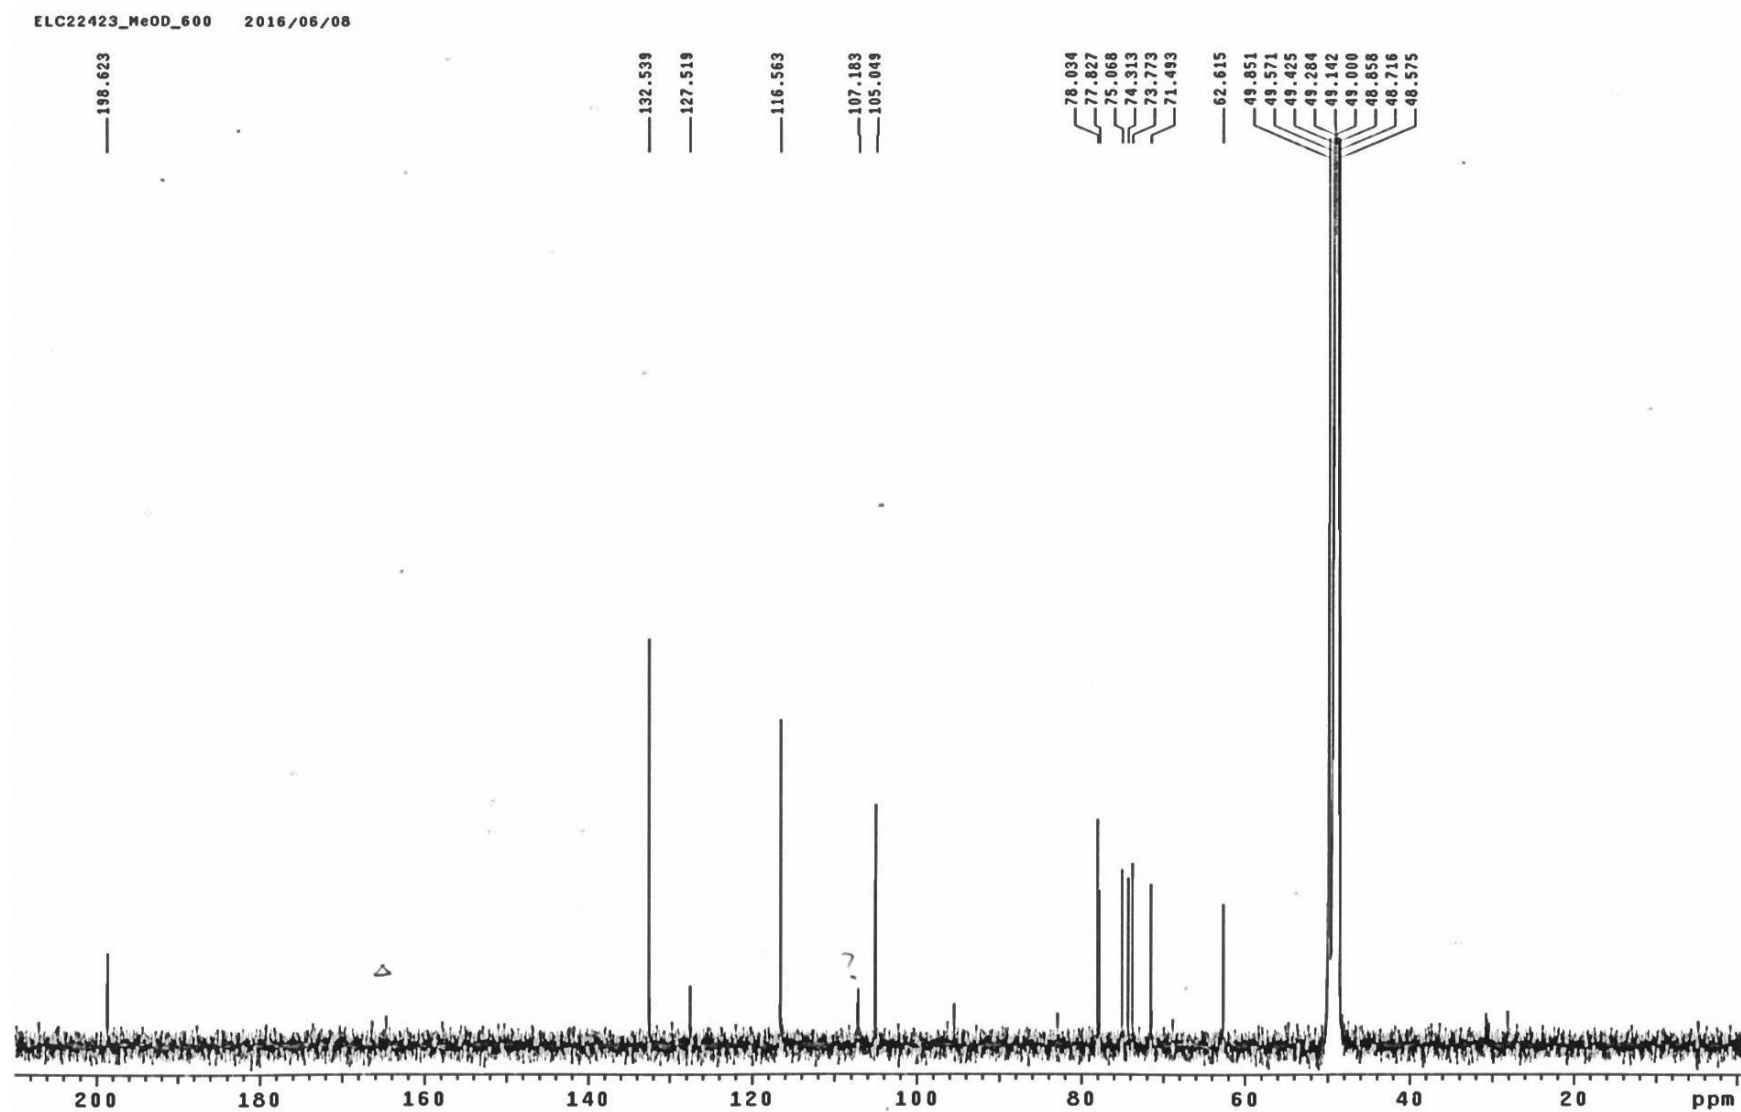

Figure S8.  $^{13}\text{C}$ -NMR spectrum of compound 11, measured in  $\text{MeOH-}d_4$  at 150 MHz.

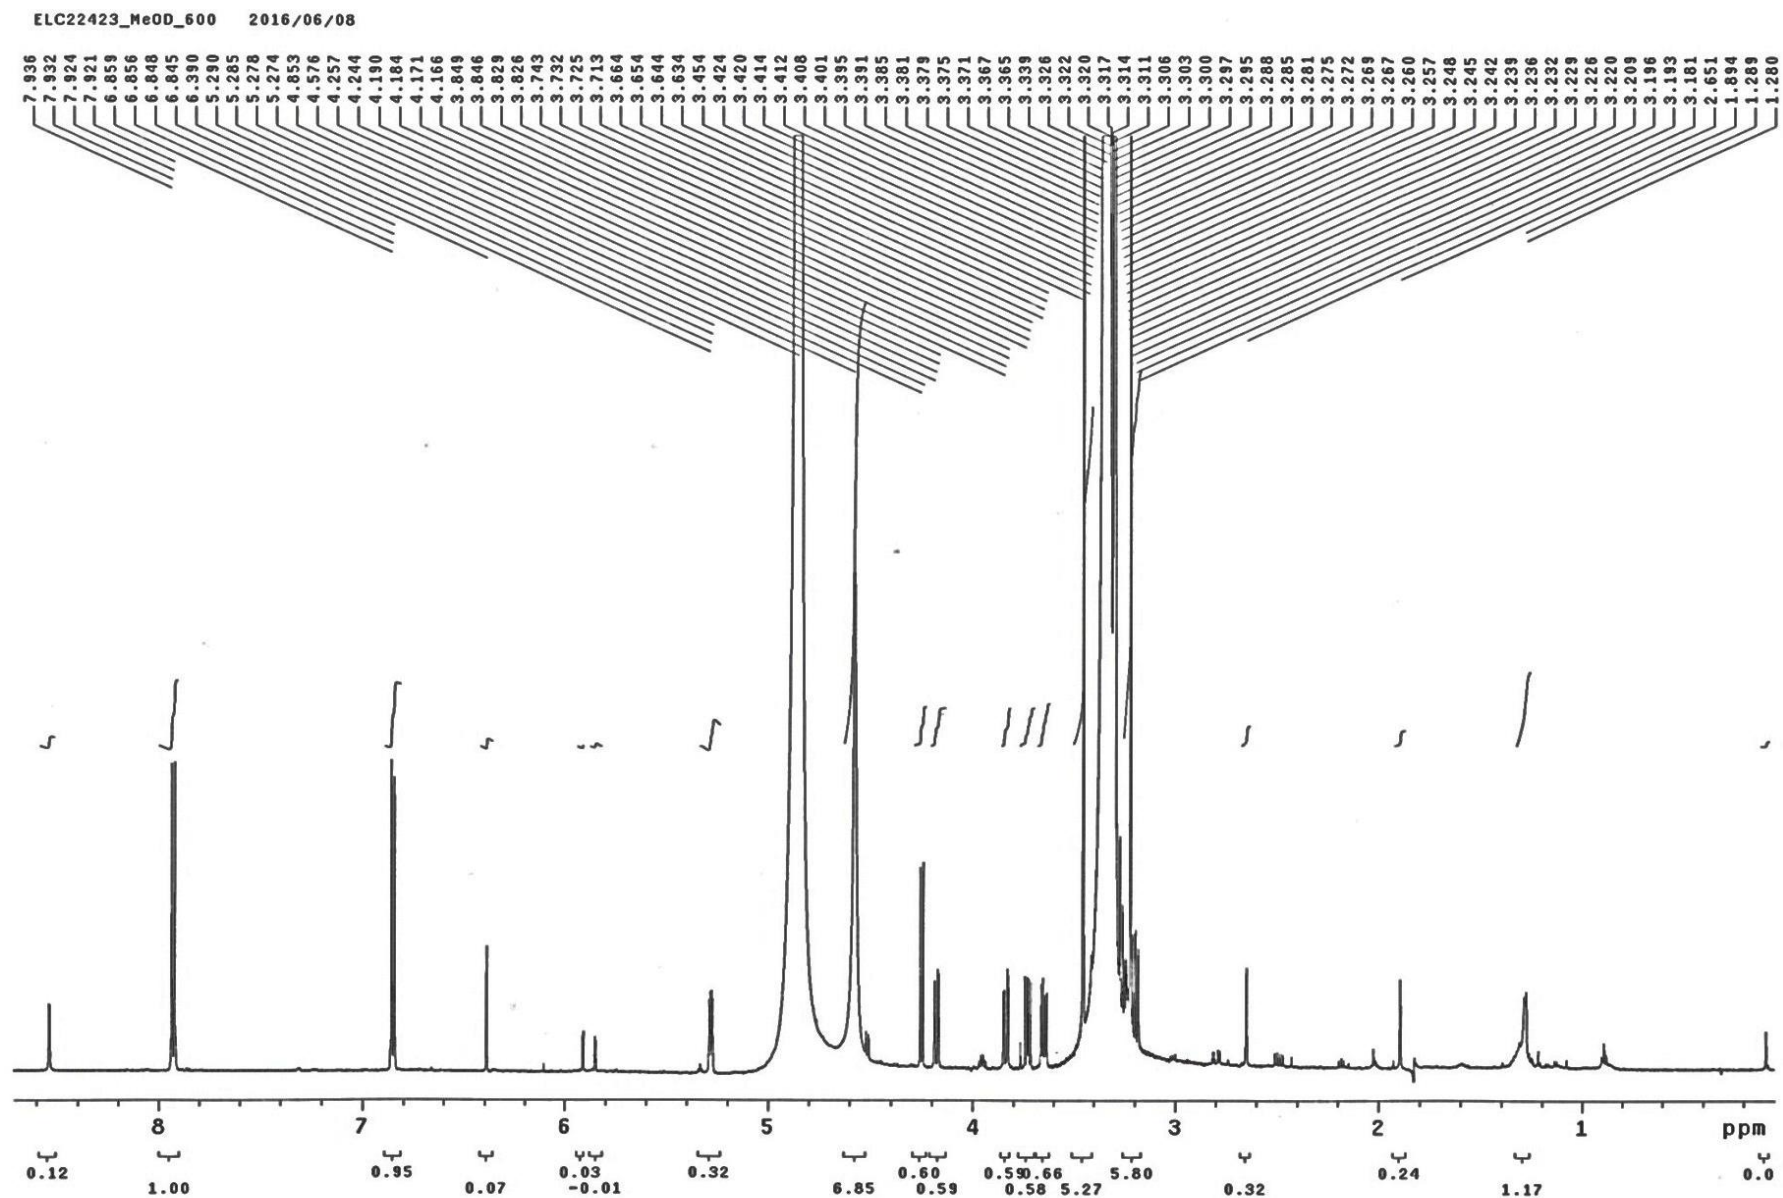

Figure S9.  $^1\text{H}$  NMR spectrum of compound 11, measured in  $\text{MeOH-}d_4$  at 600 MHz

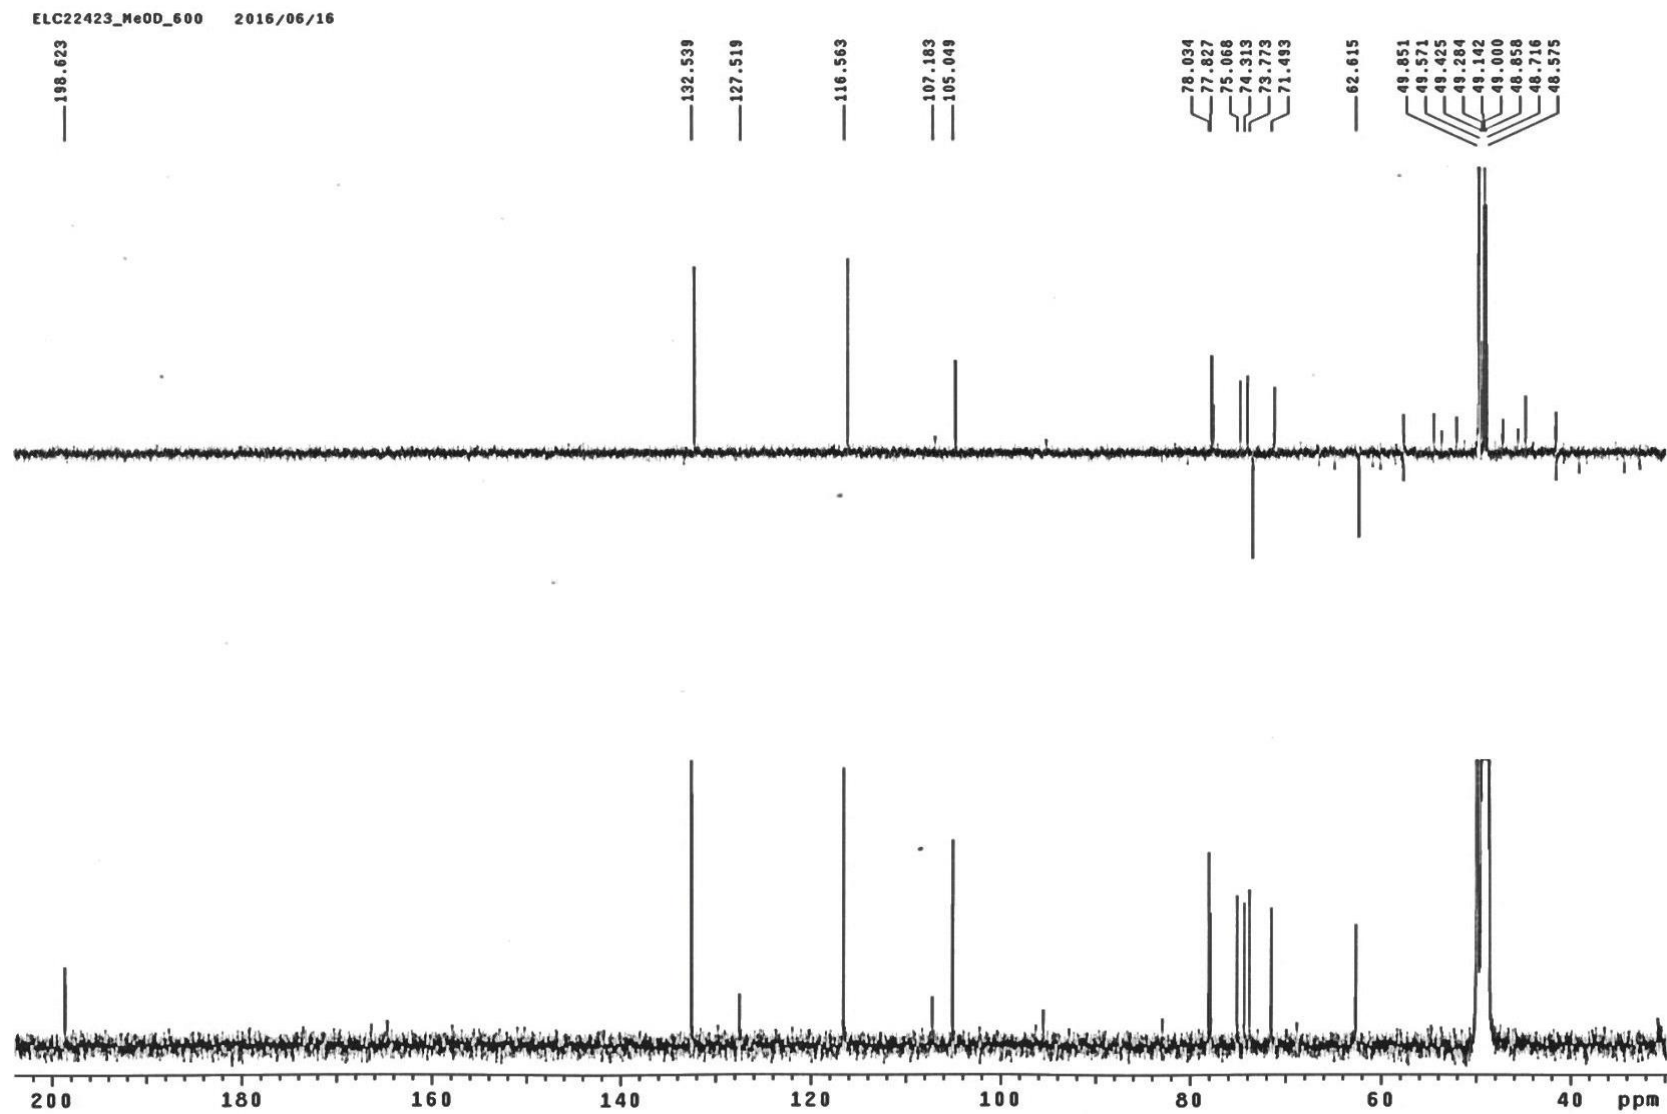

**Figure S10.** DEPT<sub>135</sub> spectrum of compound **11**, measured in MeOH-*d*<sub>4</sub> at 150 MHz

ELC22423\_MeOD\_600 2016/06/14

exp4 gHSQCAD

| SAMPLE         |             | FLAGS         | ACQUISITION ARRAYS |       |
|----------------|-------------|---------------|--------------------|-------|
| date           | Jun 14 2016 | hs            | nn                 | phase |
| solvent        | cd3od       | sspul         | y                  | 256   |
| sample         | ELC22423_02 | PFGflg        | y                  |       |
| ACQUISITION    |             | hsglv1        | 5076               | 1     |
| sw             | 6009.6      | SPECIAL       |                    | 2     |
| at             | 0.170       | temp          | 26.0               |       |
| np             | 2048        | gain          | 18                 |       |
| fb             | 4000        | spin          | not used           |       |
| ss             | 32          | GRADIENTS     |                    |       |
| dl             | 1.000       | gzlv1E        | 4237               |       |
| nt             | 16          | gtE           | 0.002000           |       |
| 2D ACQUISITION |             | EDratio       | 3.976              |       |
| sw1            | 28653.3     | gstab         | 0.000500           |       |
| nl             | 128         | F2 PROCESSING |                    |       |
| phase          | arrayed     | gf            | 0.049              |       |
| PRESATURATION  |             | gfs           | not used           |       |
| satmode        | n           | fn            | 2048               |       |
| wet            | n           | F1 PROCESSING |                    |       |
| TRANSMITTER    |             | gf1           | 0.004              |       |
| tn             | H1          | gfs1          | not used           |       |
| sfrq           | 599.869     | proc1         | 1p                 |       |
| tof            | -300.0      | fn1           | 2048               |       |
| tpwr           | 61          | DISPLAY       |                    |       |
| pw             | 13.300      | sp            | 199.3              |       |
| DECOUPLER      |             | wp            | 5393.4             |       |
| dn             | C13         | sp1           | 589.6              |       |
| dof            | 33.5        | wp1           | 20398.7            |       |
| dm             | nny         | rfl           | 305.4              |       |
| decwave        | W40_COLD    | rfp           | 0                  |       |
| dmf            | 35088       | rfl1          | -2.0               |       |
| dpwr           | 42          | rfp1          | 0                  |       |
| pxv1v1         | 59          | PLOT          |                    |       |
| pxw            | 11.300      | wc            | 152.0              |       |
| HSQC           |             | sc            | 0                  |       |
| j1xh           | 146.0       | wc2           | 150.0              |       |
| nul1flg        | y           | sc2           | 0                  |       |
| mult           | 2           | vs            | 651                |       |
| ADIABATIC      |             | th            | 1                  |       |
| pxw180ad       | COLD_ad300  | ai            | cdc                | ph    |
| pxw180adr      | COLD_ad3~   |               |                    |       |
|                | 00R         |               |                    |       |
| pxw180         | 400.0       |               |                    |       |
| pxw1v1180      | 56          |               |                    |       |
| pxw180ref      | COLD_ref~   |               |                    |       |
|                | 200         |               |                    |       |
| pxw180r        | 1998.8      |               |                    |       |
| pxw1v1180r     | 47          |               |                    |       |

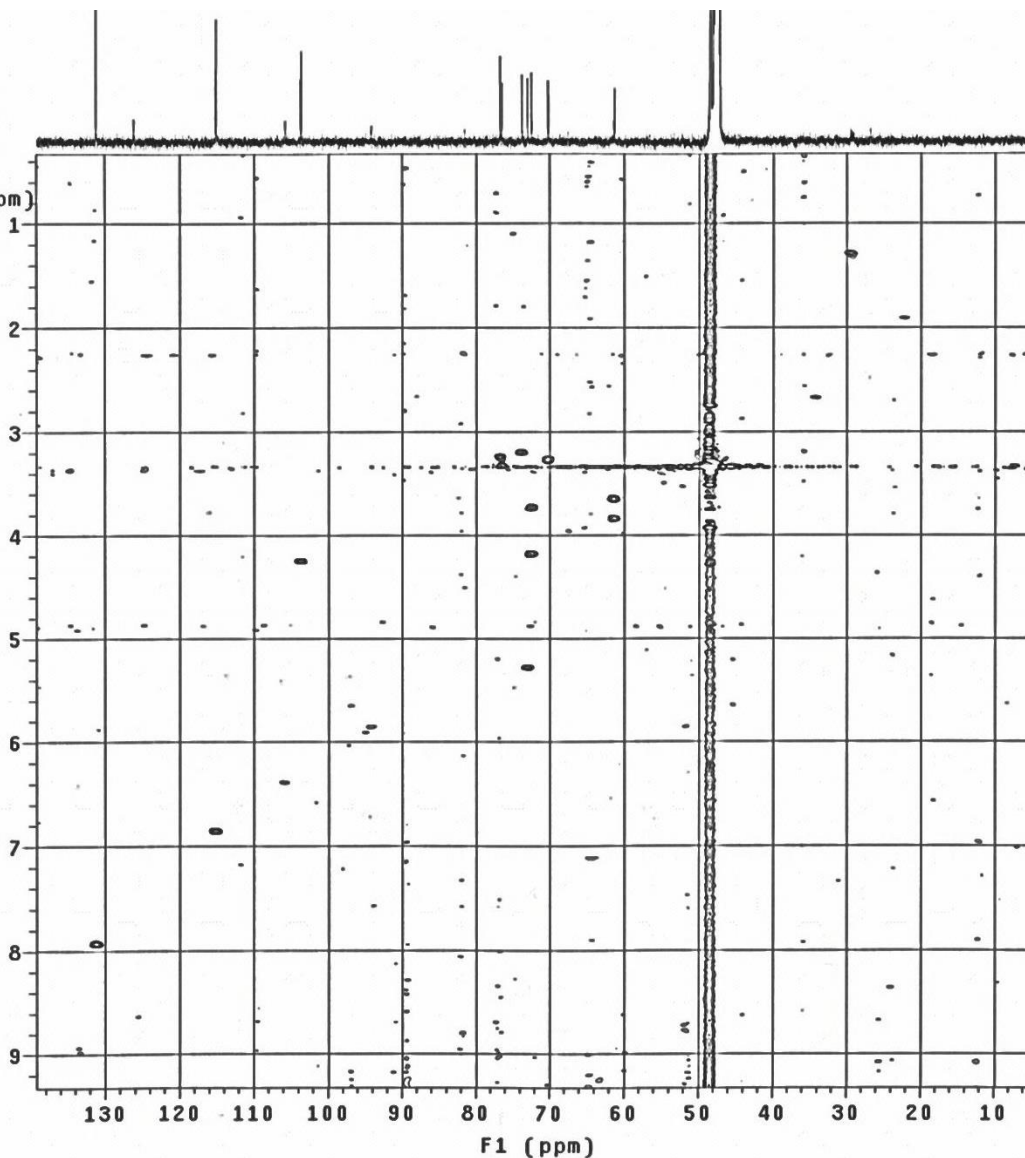

Figure S11. gHSQCAD spectrum of compound 11, measured in MeOH- $d_4$

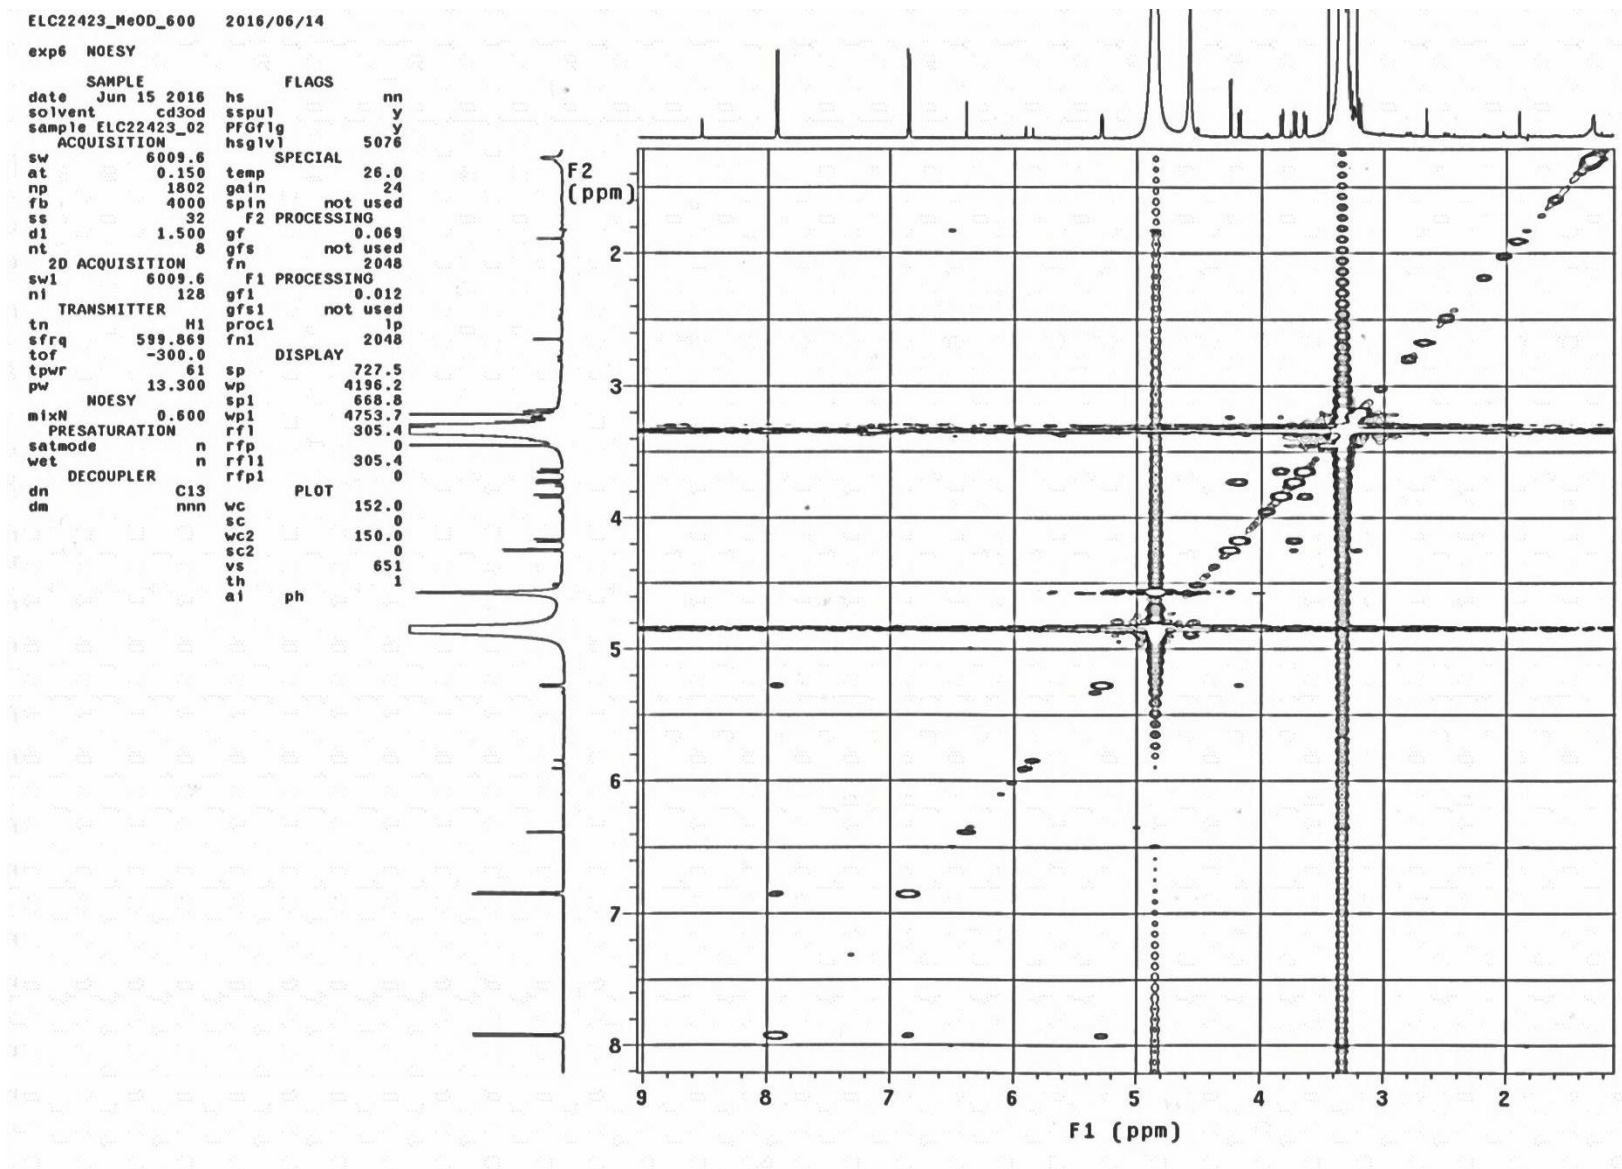

Figure S12. NOESY spectrum of compound 11, measured in MeOH- $d_4$

exp5 gCOSY

| SAMPLE         |             |  | FLAGS         |            |
|----------------|-------------|--|---------------|------------|
| date           | Jun 15 2016 |  | hs            | nn         |
| solvent        | cd3od       |  | sspul         | y          |
| sample         | ELC22423_02 |  | hsglv1        | 5076       |
| ACQUISITION    |             |  | SPECIAL       |            |
| sw             | 6009.6      |  | temp          | 26.5       |
| at             | 0.150       |  | gain          | 24         |
| np             | 1802        |  | spin          | not used   |
| fb             | 4000        |  | F2            | PROCESSING |
| ss             | 32          |  | sb            | -0.075     |
| d1             | 1.000       |  | sbs           | not used   |
| nt             | 2           |  | fn            | 2048       |
| 2D ACQUISITION |             |  | F1 PROCESSING |            |
| sw1            | 6009.6      |  | sb1           | -0.027     |
| n1             | 256         |  | sbs1          | not used   |
| d2             | 0           |  | procl         | 1p         |
| PRESATURATION  |             |  | fml           |            |
| satmode        | n           |  |               | 2048       |
| wet            |             |  | DISPLAY       |            |
| TRANSMITTER    |             |  | sp            | -299.6     |
| tn             |             |  | wp            | 6003.7     |
| tf             | H1          |  | sp1           | -299.6     |
| sfreq          | 599.869     |  | wp1           | 6003.7     |
| tof            | -300.0      |  | rfl           | 305.4      |
| tpwr           | 61          |  | rfp           | 0          |
| pw             | 13.300      |  | rfl1          | 305.4      |
| GRADIENTS      |             |  | rflp1         | 0          |
| gzlvIE         | 4237        |  | PLOT          |            |
| gtE            | 0.001000    |  | wc            | 152.0      |
| EDratio        | 1.000       |  | sc            | 0          |
| gstab          | 0.000500    |  | wc2           | 150.0      |
| DECOUPLER      |             |  | sc2           | 0          |
| dn             | C13         |  | vs            | 651        |
| dm             | nnn         |  | th            | 2          |
|                |             |  | ai            | cdc av     |

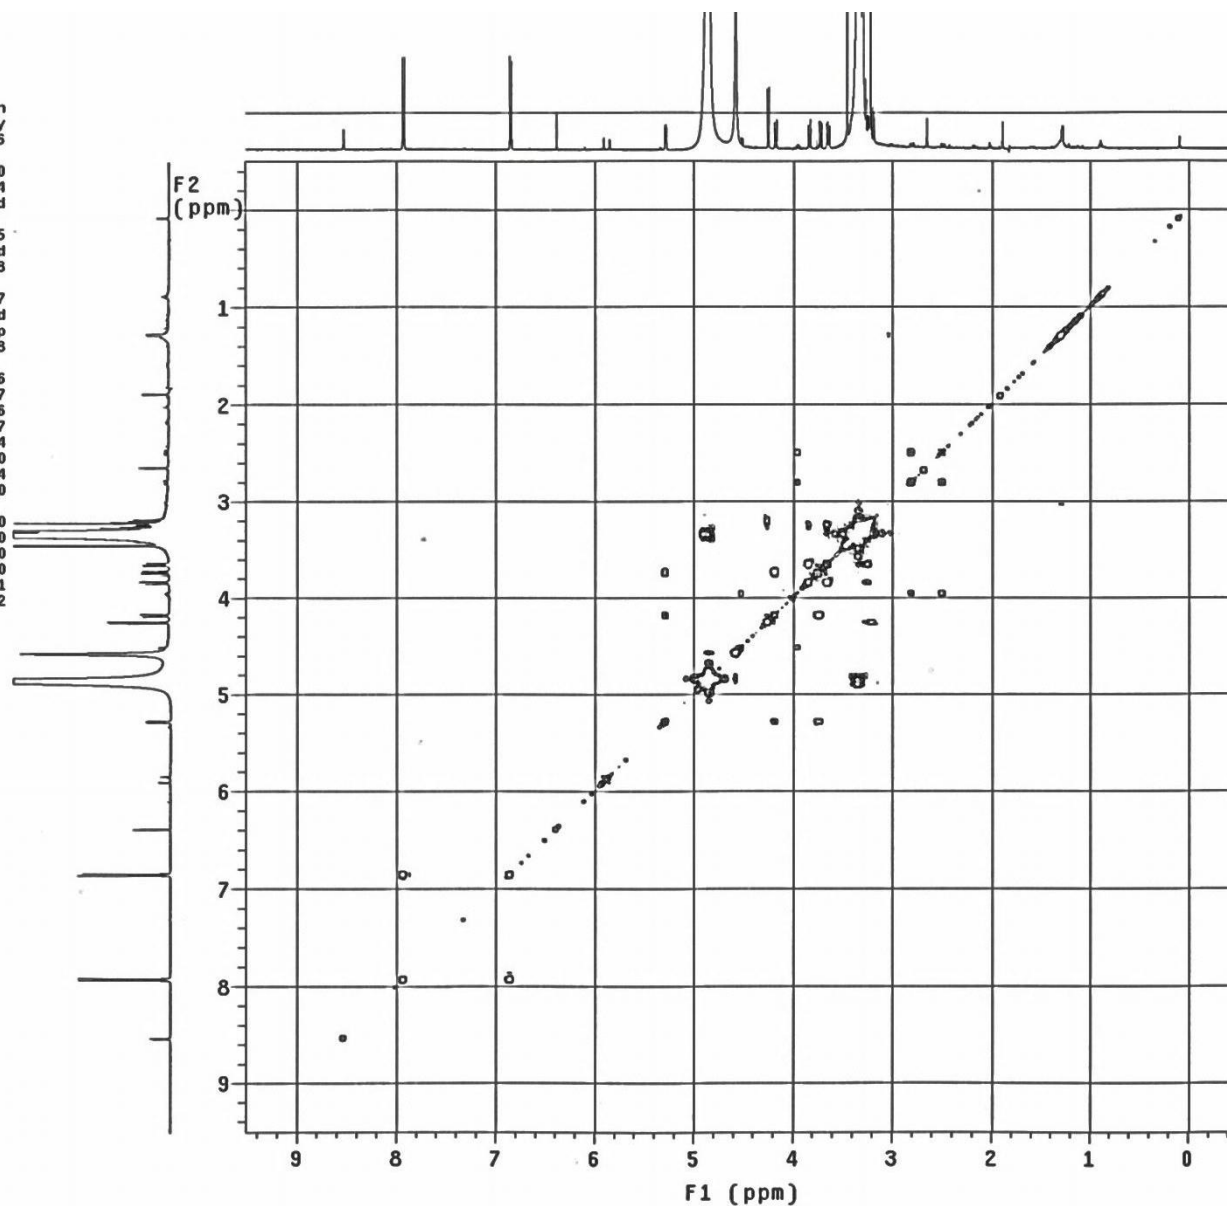

**Figure S13.** gCOSY spectrum of compound **11**, measured in MeOH- $d_4$

ELC22423\_MeOD\_600 2016/06/16

exp44 gHMBCAD

| SAMPLE         |             | FLAGS         | nn       | ACQUISITION | ARRAYS | phase |
|----------------|-------------|---------------|----------|-------------|--------|-------|
| date           | Jun 19 2016 | hs            |          | array       |        | 512   |
| solvent        | cd3od       | sspul         | y        | arraydim    |        |       |
| sample         | ELC22423_03 | PF6f1g        | y        |             |        |       |
| ACQUISITION    |             | hsglv1        | 5052     | 1           |        | phase |
| sw             | 6009.6      | SPECIAL       |          | 1           |        |       |
| at             | 0.150       | temp          | 26.0     | 2           |        | (rpm) |
| np             | 1802        | gain          | 24       |             |        |       |
| fb             | 4000        | spin          | not used |             |        |       |
| ss             | 32          | GRADIENTS     |          |             |        |       |
| d1             | 1.000       | g2lv11        | 421      |             |        |       |
| nt             | 72          | gt1           | 0.001000 |             |        |       |
| 2D ACQUISITION |             | g2lv13        | 1263     |             |        |       |
| sw1            | 34692.1     | gt3           | 0.001000 |             |        |       |
| nl             | 256         | gstab         | 0.000500 |             |        |       |
| phase          | arrayed     | F2 PROCESSING |          |             |        |       |
| PRESATURATION  |             | sb            | -0.075   |             |        |       |
| satmode        | y           | sbs           | not used |             |        |       |
| wet            | n           | fn            | 2048     |             |        |       |
| TRANSMITTER    |             | F1 PROCESSING |          |             |        |       |
| tn             | H1          | gf1           | 0.007    |             |        |       |
| sfrq           | 599.869     | gfs1          | not used |             |        |       |
| tof            | -300.0      | procl         | 1p       |             |        |       |
| tpwr           | 61          | fn1           | 2048     |             |        |       |
| pw             | 12.400      | DISPLAY       |          |             |        |       |
| DECOUPLER      |             | sp            | 1331.9   |             |        |       |
| dn             | C13         | wp            | 3773.6   |             |        |       |
| dof            | 2296.1      | sp1           | 4767.5   |             |        |       |
| dm             | nnn         | wp1           | 26019.1  |             |        |       |
| decwave        | W40_COLD    | rf1           | 305.4    |             |        |       |
| dmf            | 35088       | rfl           | 0        |             |        |       |
| dpwr           | 42          | rfl1          | 754.8    |             |        |       |
| pwxlvl         | 58          | rflp1         | 0        |             |        |       |
| pwX            | 13.000      | PLOT          |          |             |        |       |
| HMBC           |             | wc            | 152.0    |             |        |       |
| j1xh           | 146.0       | sc            | 0        |             |        |       |
| jnxh           | 8.0         | wc2           | 150.0    |             |        |       |
| ADIABATIC      |             | sc2           | 0        |             |        |       |
| pwX180ad       | COLD_ad300  | vs            | 25       |             |        |       |
| pwXlv1180      | 56          | th            | 2        |             |        |       |
| pwX180         | 400.0       | ai            | cdc      |             |        |       |
|                |             | av            |          |             |        |       |

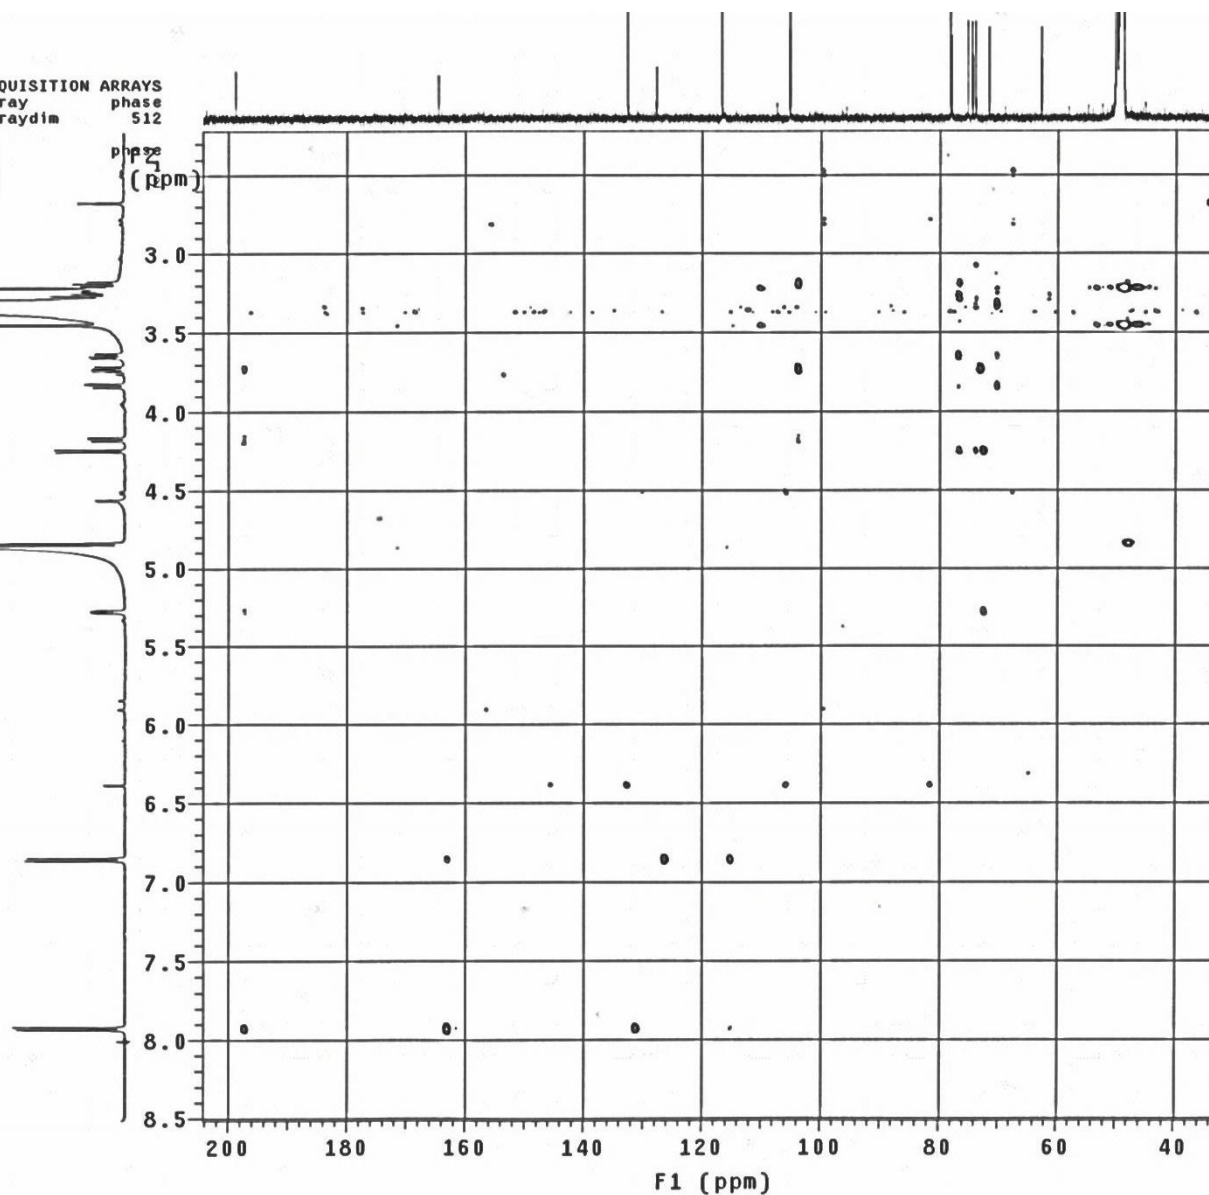

Figure S14. gHMBCAD spectrum of compound 11, measured in MeOH- $d_4$

1.3. NMR spectrums of Compound 12, 1-*O*-(3-methyl)-butenoyl-myo-inositol: Figure S15 – Figure S21

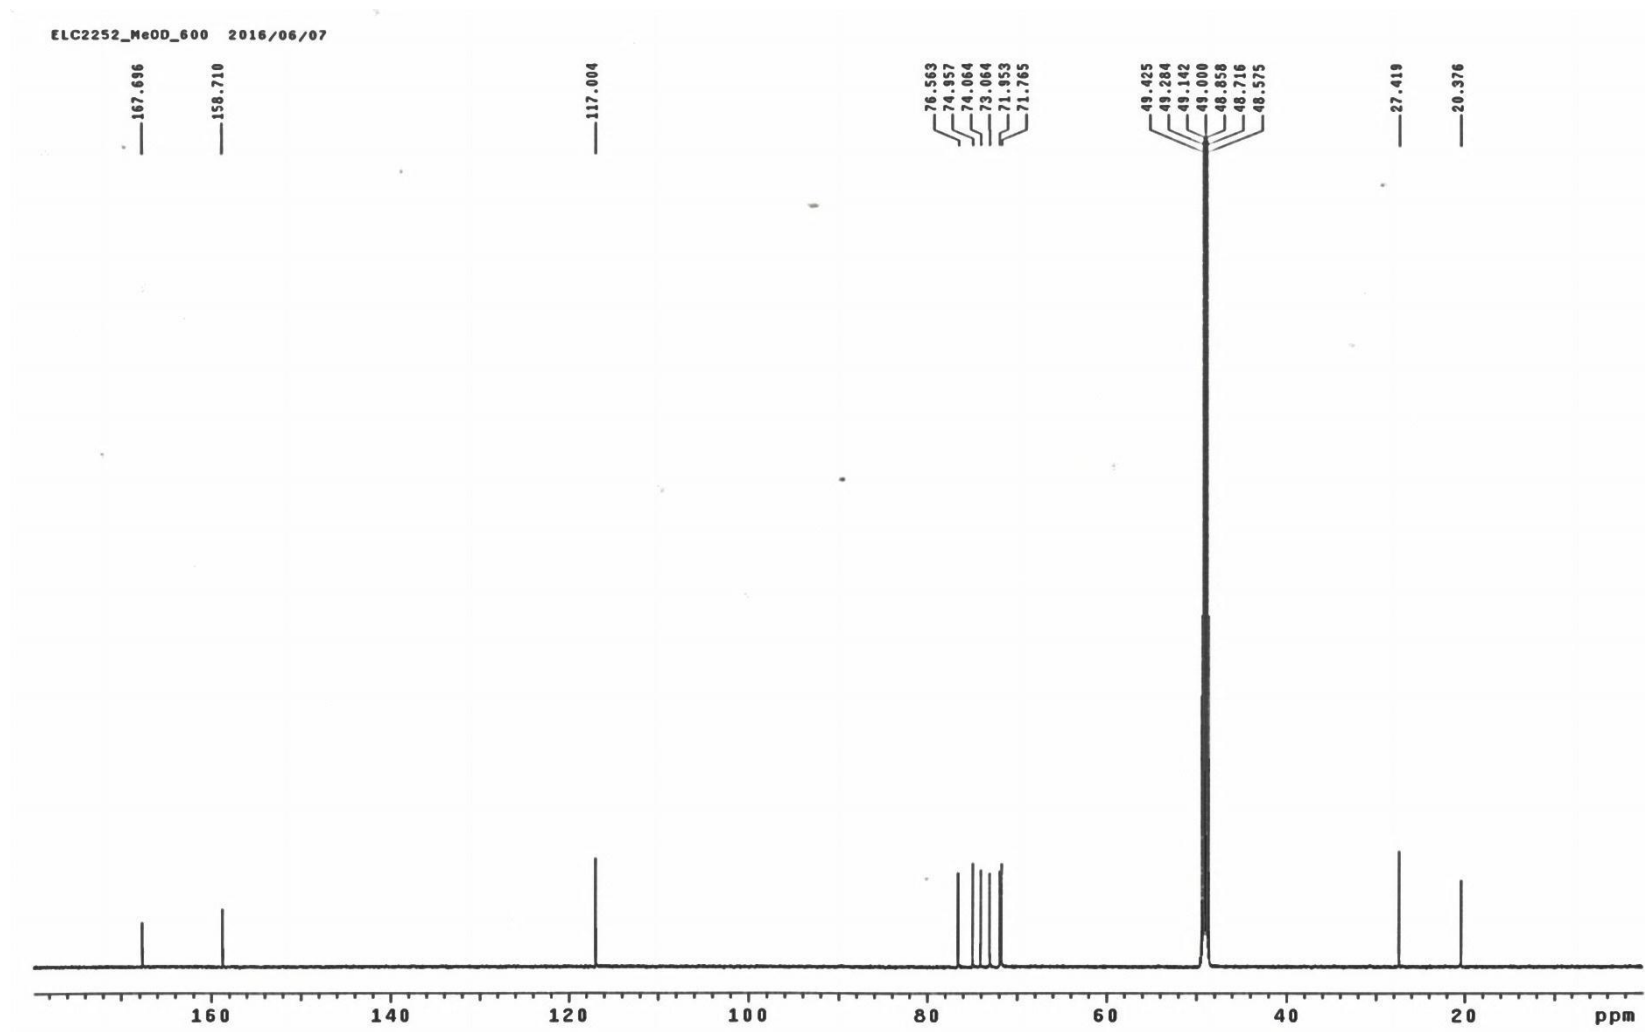

Figure S15.  $^{13}\text{C}$ -NMR spectrum of compound 12, measured in  $\text{MeOH-}d_4$  at 150 MHz

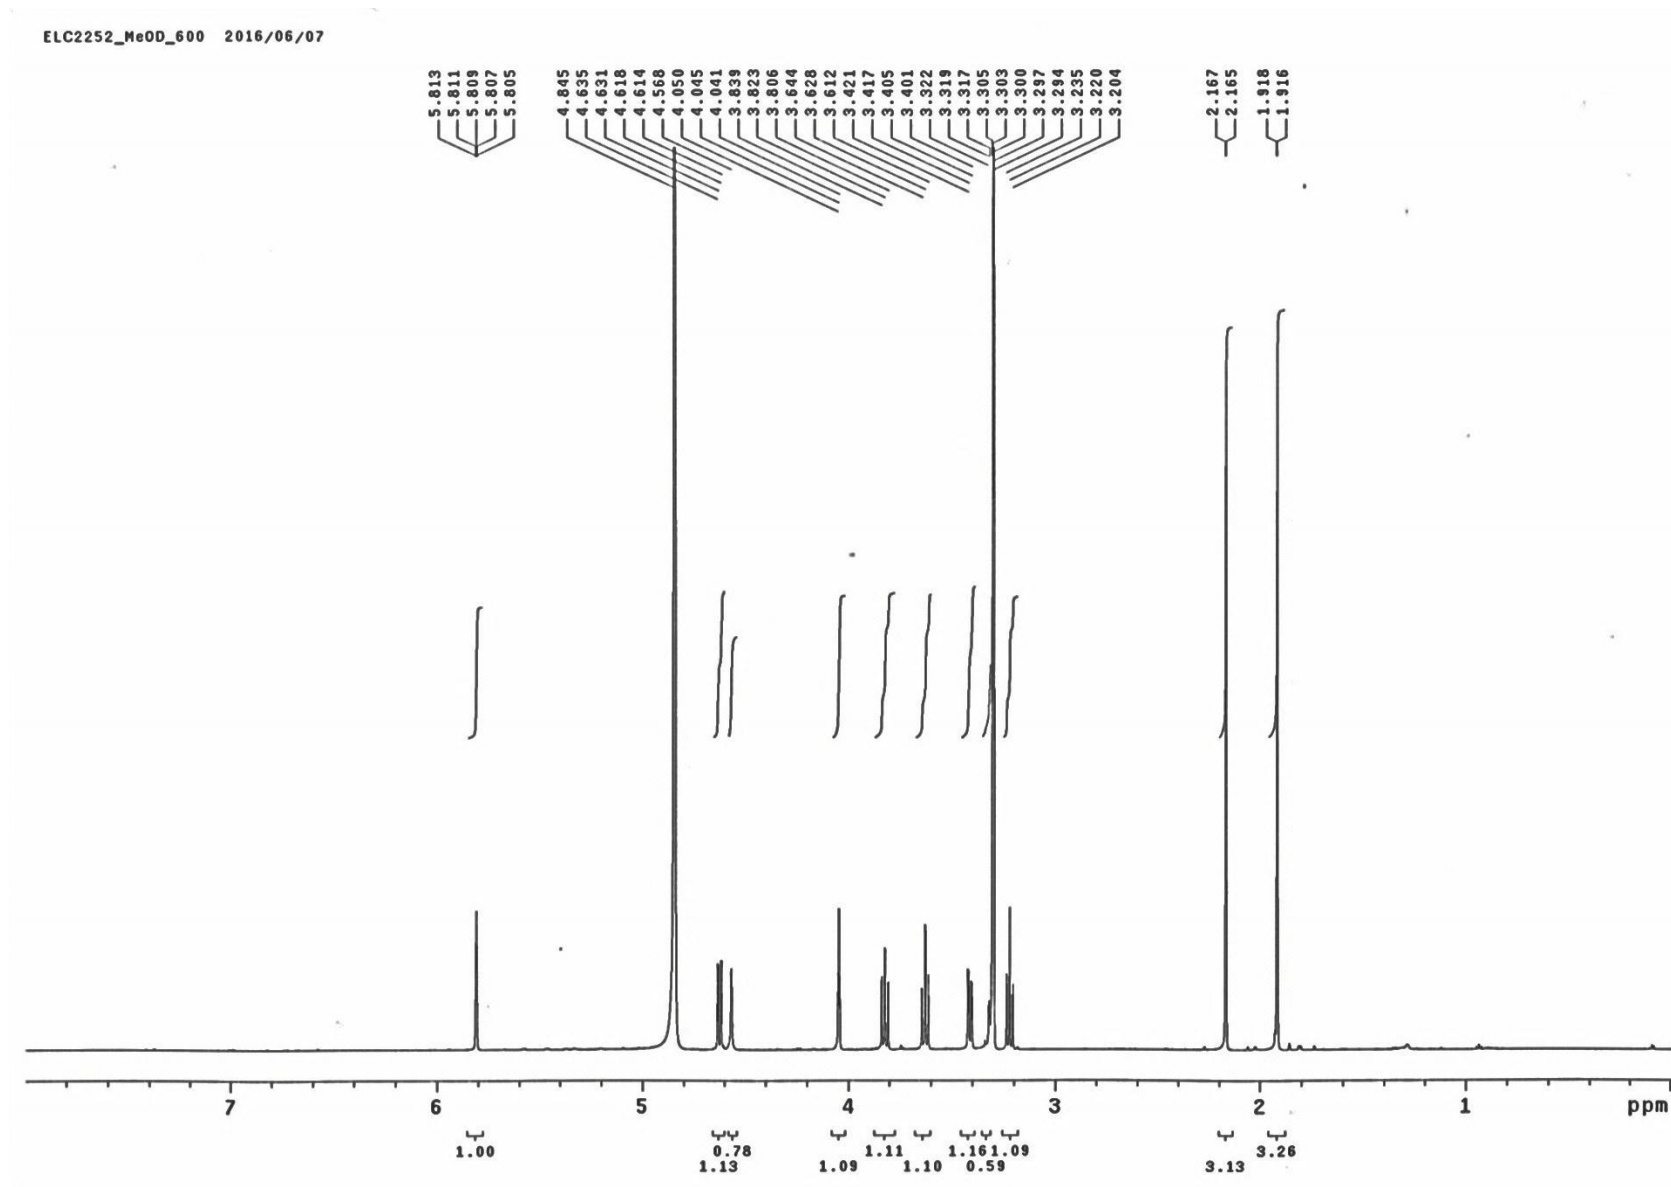

**Figure S16.**  $^1\text{H}$  NMR spectrum of compound **12**, measured in  $\text{MeOH-}d_4$  at 600 MHz

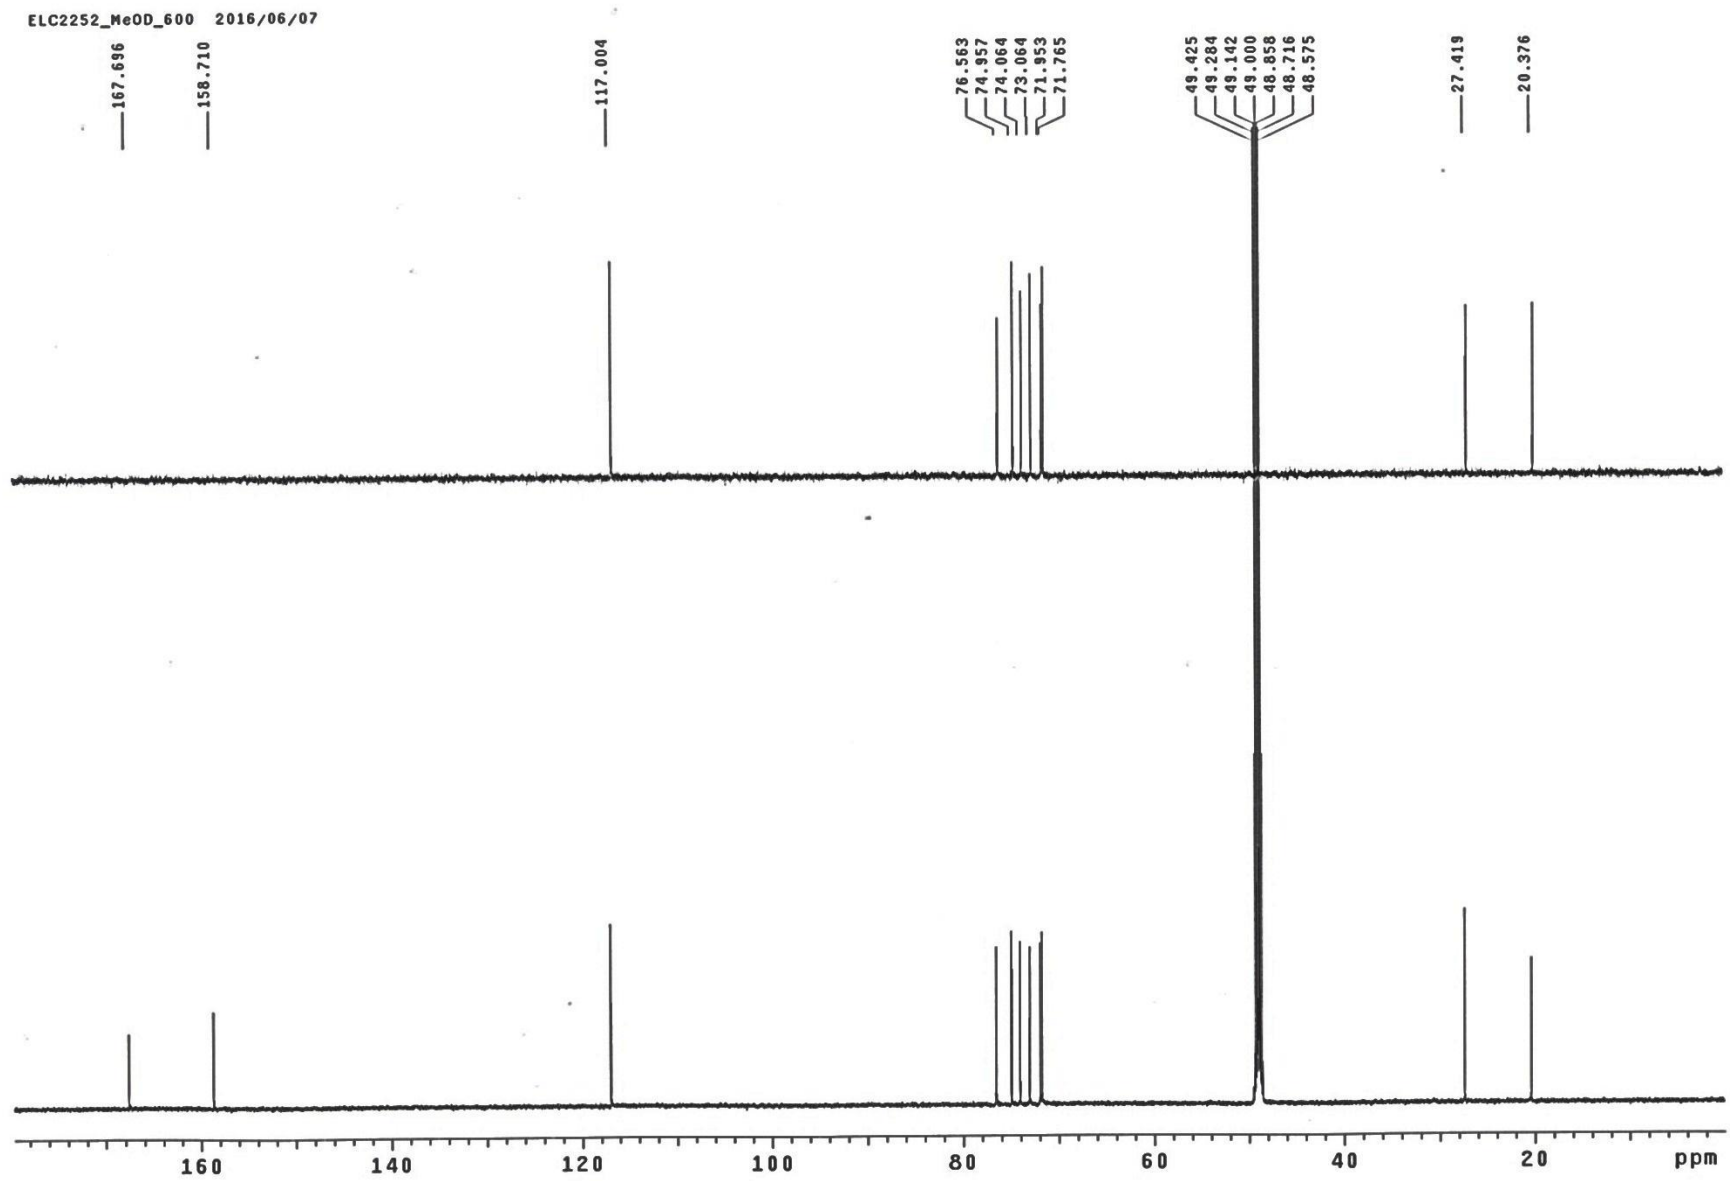

Figure S17. DEPT<sub>135</sub> spectrum of compound **12**, measured in MeOH-*d*<sub>4</sub> at 150 MHz

exp5 gHSQCAD

| SAMPLE         |            | FLAGS         | ACQUISITION |          | ARRAYS |
|----------------|------------|---------------|-------------|----------|--------|
| date           | Jun 8 2016 | hs            | nn          | array    | phase  |
| solvent        | cd3od      | sspul         | y           | arraydim | 256    |
| sample         | ELC2252_01 | PFGflg        | y           |          |        |
| ACQUISITION    |            | hsglv1        | 5076        | 1        | phase  |
| sw             | 6613.8     | SPECIAL       |             | 1        | F2     |
| at             | 0.155      | temp          | 26.0        | 2        | (ppm)  |
| np             | 2048       | gain          | 30          |          |        |
| fb             | 4000       | spin          | not used    |          |        |
| ss             | 32         | GRADIENTS     |             |          |        |
| d1             | 1.000      | gzlv1E        | 4237        |          |        |
| nt             | 8          | gtE           | 0.002000    |          |        |
| 2D ACQUISITION |            | EDratio       | 3.976       |          |        |
| sw1            | 29411.8    | gstab         | 0.000500    |          |        |
| ni             | 128        | F2 PROCESSING |             |          |        |
| phase          | arrayed    | gf            | 0.049       |          |        |
| PRESATURATION  |            | gfs           | not used    |          |        |
| satmode        | n          | fn            | 2048        |          |        |
| wet            | n          | F1 PROCESSING |             |          |        |
| TRANSMITTER    |            | gf1           | 0.004       |          |        |
| tn             | H1         | gfs1          | not used    |          |        |
| sfrq           | 599.869    | procl         | 1p          |          |        |
| tof            | -300.0     | fn1           | 2048        |          |        |
| tpwr           | 61         | DISPLAY       |             |          |        |
| pw             | 13.300     | sp            | 238.6       |          |        |
| DECOUPLER      |            | wp            | 4069.0      |          |        |
| dn             | C13        | sp1           | 1055.2      |          |        |
| dof            | -343.6     | wp1           | 24040.7     |          |        |
| dm             | nny        | rfl           | 607.5       |          |        |
| decwave        | W40_COLD   | rfl           | 0           |          |        |
| dmf            | 35088      | rfl1          | 754.3       |          |        |
| dpwr           | 42         | rflp1         | 0           |          |        |
| pxlv1          | 59         | PLOT          |             |          |        |
| pw             | 11.300     | wc            | 152.0       |          |        |
| HSQC           |            | sc            | 0           |          |        |
| j1xh           | 146.0      | wc2           | 150.0       |          |        |
| nullflg        | y          | sc2           | 0           |          |        |
| mult           | 2          | vs            | 328         |          |        |
| ADIABATIC      |            | th            | 2           |          |        |
| pxw180ad       | COLD_ad300 | ai            | cdc         | ph       |        |
| pxw180adR      | COLD_ad3~  |               |             |          |        |
|                | 00R        |               |             |          |        |
| pxw180         | 400.0      |               |             |          |        |
| pxwlv180       | 56         |               |             |          |        |
| pxw180ref      | COLD_ref~  |               |             |          |        |
|                | 200        |               |             |          |        |
| pxw180r        | 1998.8     |               |             |          |        |
| pxwlv180r      | 47         |               |             |          |        |

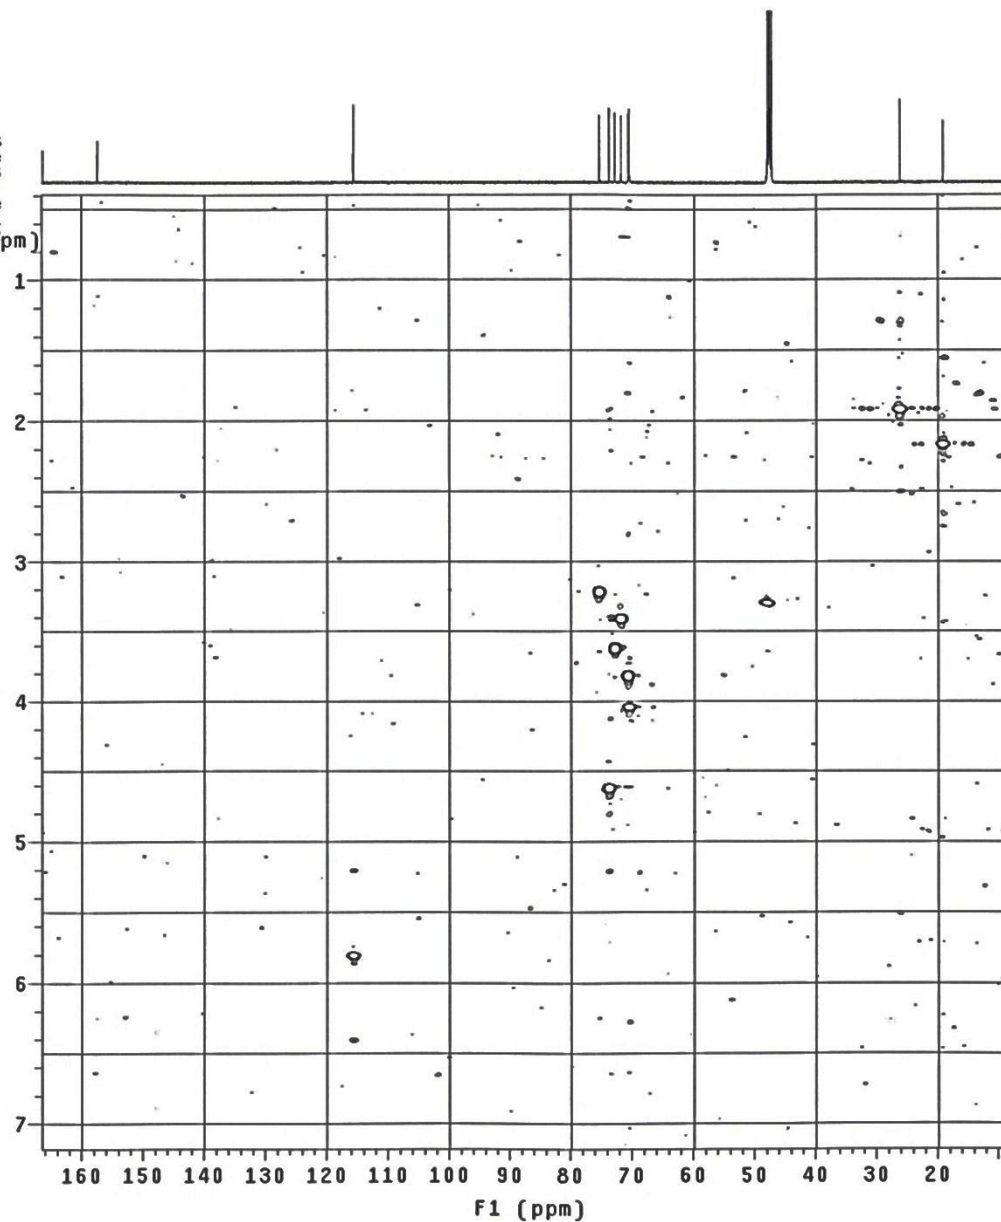Figure S18. gHSQCAD spectrum of compound 12, measured in MeOH-*d*<sub>4</sub>

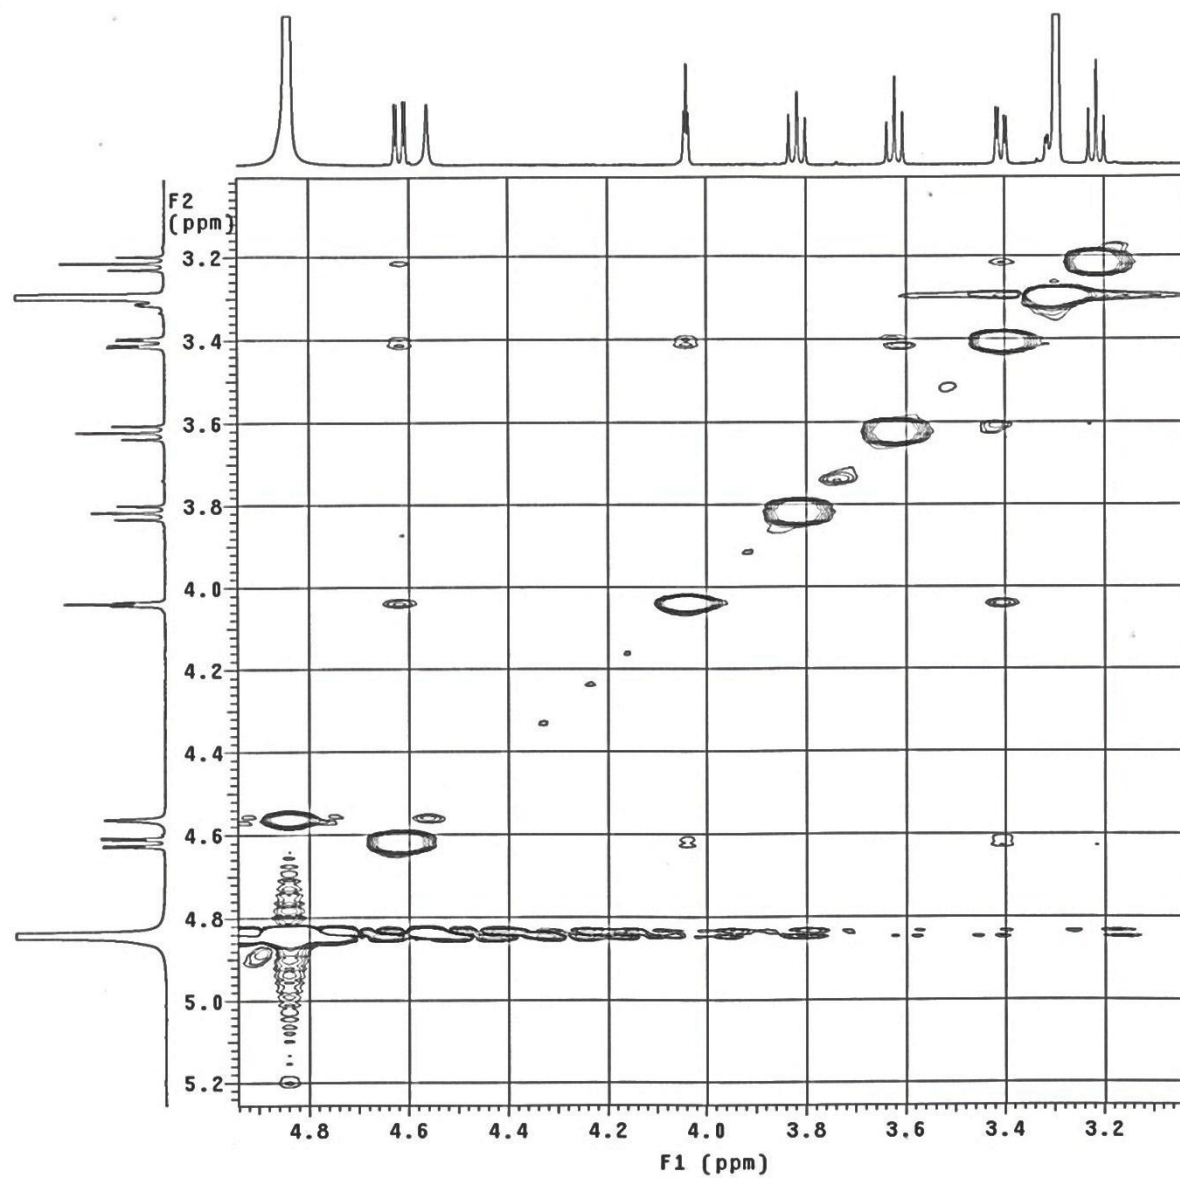

Figure S19. NOESY spectrum of compound **12**, measured in MeOH-*d*<sub>4</sub>

ELC2252\_MeOD\_600 2016/06/07

exp3 gCOSY

| SAMPLE         |             | FLAGS         |          |
|----------------|-------------|---------------|----------|
| date           | Jun 14 2016 | hs            | nn       |
| solvent        | cd3od       | sspul         | y        |
| sample         | ELC2252_01  | hsglv1        | 5076     |
| ACQUISITION    |             | SPECIAL       |          |
| sw             | 4194.6      | temp          | 26.0     |
| at             | 0.150       | gain          | 34       |
| np             | 1258        | spin          | not used |
| fb             | 4000        | F2 PROCESSING |          |
| ss             | 32          | sb            | -0.075   |
| d1             | 1.000       | sbs           | not used |
| nt             | 1           | fn            | 2048     |
| 2D ACQUISITION |             | F1 PROCESSING |          |
| sw1            | 4194.6      | sb1           | -0.039   |
| ni             | 256         | sbs1          | not used |
| d2             | 0           | proc1         | 1p       |
| PRESATURATION  |             | F1 PROCESSING |          |
| satmode        | n           | fn1           | 2048     |
| wet            | n           | sp            | 6.3      |
| TRANSMITTER    |             | wp            | 4190.5   |
| tn             | H1          | sp1           | 6.3      |
| sfrq           | 599.868     | wp1           | 4190.5   |
| tof            | -899.8      | rfl           | -2.2     |
| tpwr           | 61          | rfp           | 0        |
| pw             | 13.300      | rfl1          | -2.2     |
| GRADIENTS      |             | rflp1         | 0        |
| gzlv1E         | 4237        | PLOT          |          |
| gtE            | 0.001000    | wc            | 152.0    |
| EDratio        | 1.000       | sc            | 0        |
| gstab          | 0.000500    | wc2           | 150.0    |
| DECOUPLER      |             | sc2           | 0        |
| dn             | C13         | vs            | 633      |
| dm             | nnn         | th            | 4        |
|                | a1          | cdc           | av       |

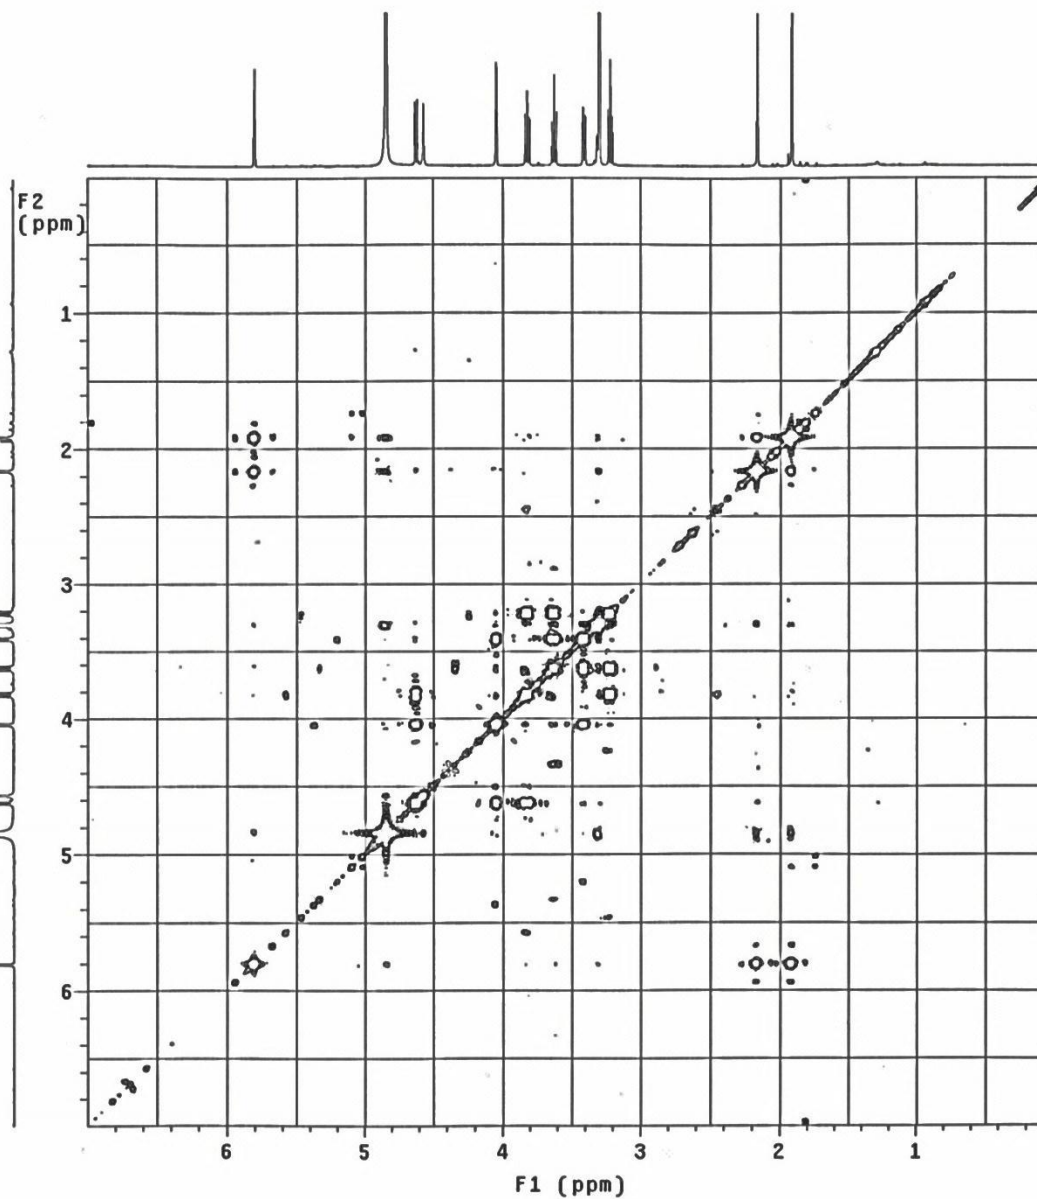

Figure S20. gCOSY spectrum of compound **12**, measured in MeOH- $d_4$

ELC2252\_MeOD\_600 2016/06/07

exp6 gHMBCAD

| SAMPLE         |            | FLAGS         | nn       | ACQUISITION | ARRAYS |
|----------------|------------|---------------|----------|-------------|--------|
| date           | Jun 8 2016 | hs            | nn       | array       | phase  |
| solvent        | cd3od      | sspul         | y        | arraydim    | 512    |
| sample         | ELC2252_01 | PFGflg        | y        |             |        |
| ACQUISITION    |            | hsglv1        | 5076     | 1           | phase  |
| sw             | 6613.8     | SPECIAL       |          | 1           | F2     |
| at             | 0.150      | temp          | 26.0     | 2           |        |
| np             | 1984       | gain          | 36       |             |        |
| fb             | 4000       | spin          | not used |             |        |
| ss             | 32         | GRADIENTS     |          |             |        |
| d1             | 1.000      | g2lv11        | 423      |             |        |
| nt             | 8          | gt1           | 0.001000 |             |        |
| 2D ACQUISITION |            | g2lv13        | 1269     |             |        |
| sw1            | 34692.1    | gt3           | 0.001000 |             |        |
| nl             | 256        | gstab         | 0.000500 |             |        |
| phase          | arrayed    | F2 PROCESSING |          |             |        |
| PRESATURATION  |            | sb            | -0.075   |             |        |
| satmode        | n          | sbs           | not used |             |        |
| wet            | n          | fn            | 2048     |             |        |
| TRANSMITTER    |            | F1 PROCESSING |          |             |        |
| tn             | H1         | gf1           | 0.007    |             |        |
| sfrq           | 599.869    | gfs1          | not used |             |        |
| tof            | -300.0     | proc1         | lp       |             |        |
| tpwr           | 61         | fn1           | 2048     |             |        |
| pw             | 13.300     | DISPLAY       |          |             |        |
| DECOUPLER      |            | sp            | 471.1    |             |        |
| dn             | C13        | wp            | 3520.0   |             |        |
| dof            | 2296.1     | sp1           | 498.7    |             |        |
| dm             | nnn        | wp1           | 26798.3  |             |        |
| decwave        | W40_COLD   | rfl           | 607.5    |             |        |
| dmf            | 35088      | rfp           | 0        |             |        |
| dpwr           | 42         | rfl1          | 754.8    |             |        |
| pw1v1          | 59         | rfl1          | 0        |             |        |
| pw1            | 11.300     | PLOT          |          |             |        |
| HMBC           |            | wc            | 152.0    |             |        |
| j1xh           | 146.0      | sc            | 0        |             |        |
| jnxh           | 8.0        | wc2           | 150.0    |             |        |
| ADIABATIC      |            | sc2           | 0        |             |        |
| pw180ad        | COLD_ad300 | vs            | 328      |             |        |
| pw1v1180       | 56         | th            | 2        |             |        |
| pw180          | 400.0      | al            | cdc av   |             |        |

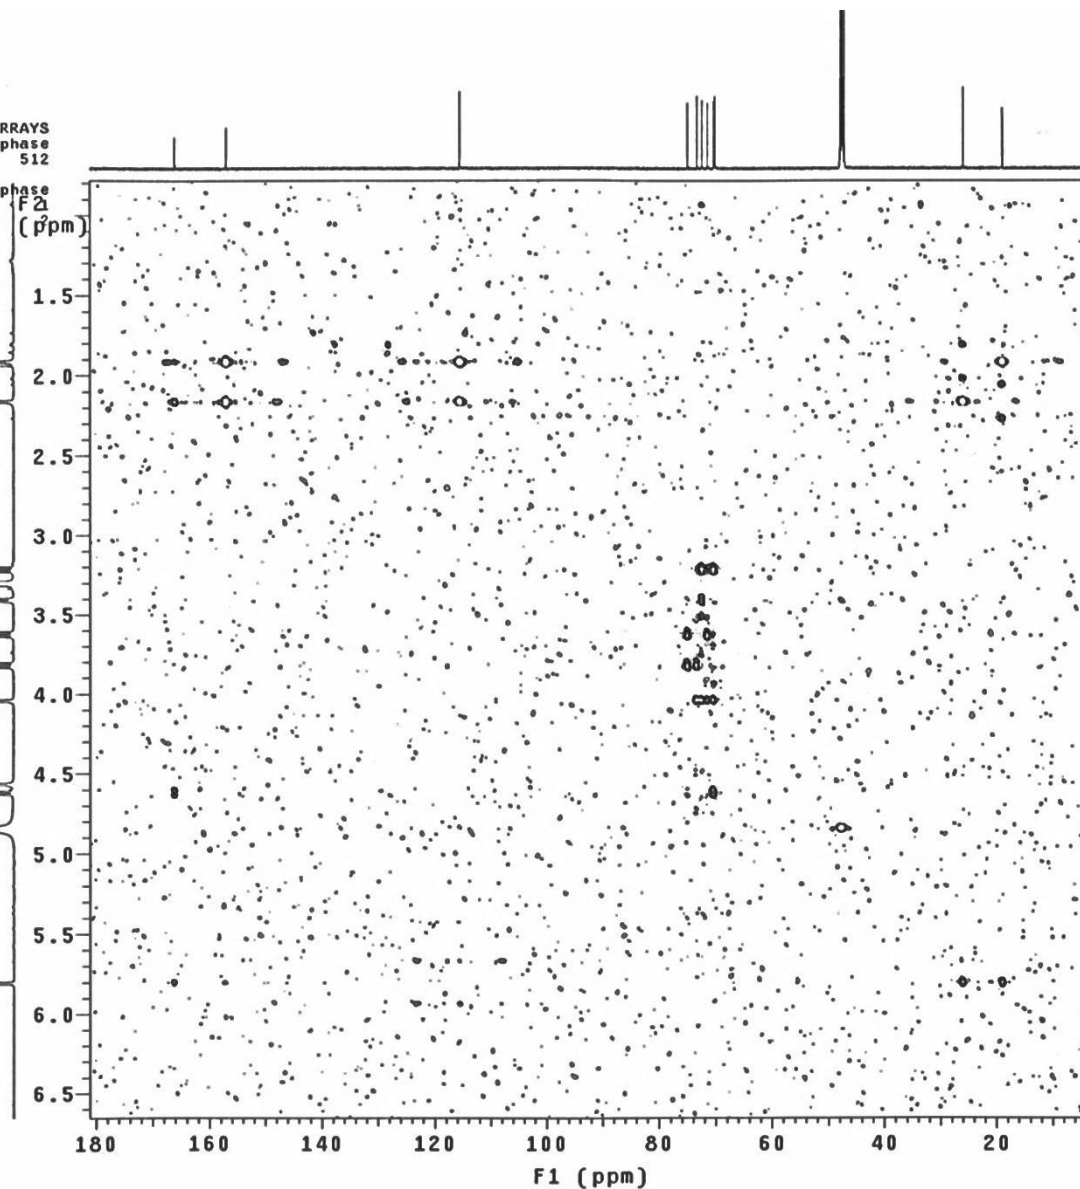

Figure S21. gHMBCAD spectrum of compound 12, measured in MeOH- $d_4$

2. IC<sub>50</sub> plots for all tested compounds: 1, 5, 10, 11, 12 14, 18, 19, and 20 (Figure S22 – Figure S30), and acarbose (Figure S31)

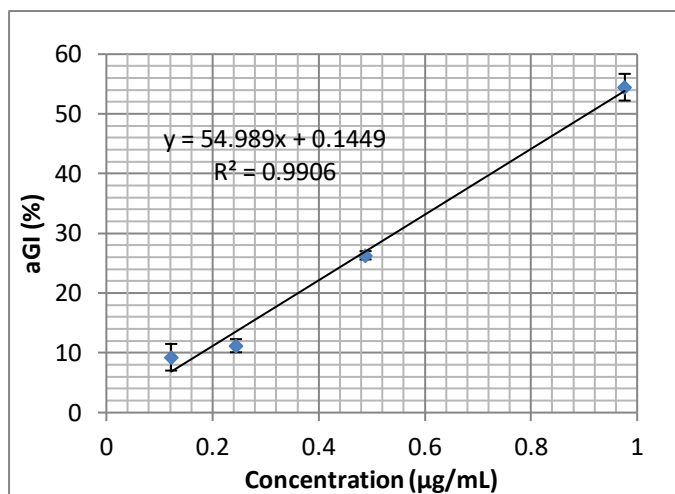

Figure S22. IC<sub>50</sub> plots for compound 1: Walterolactone A/B β-D-pyranoglucoside

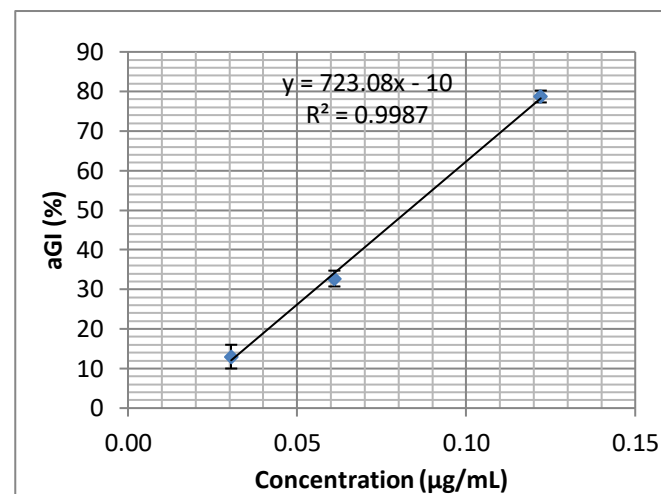

Figure S23. IC<sub>50</sub> plots for compound 5: Condensed tannin-ELCTB-2.1.2

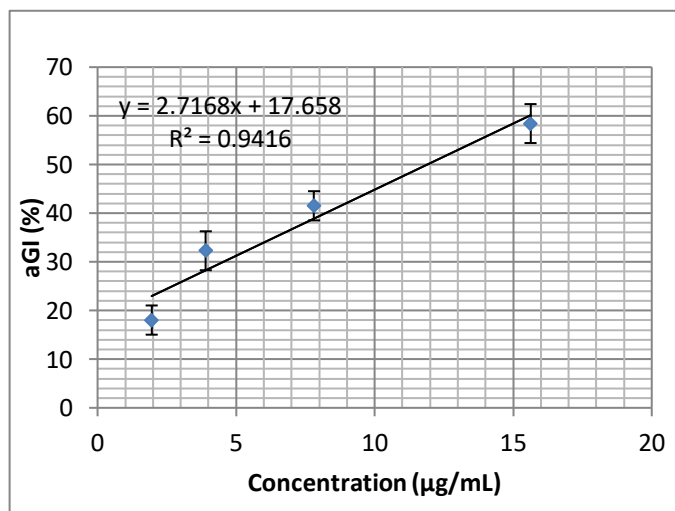

Figure S24. IC<sub>50</sub> plots for compound 10: (-)-Gallocatechin

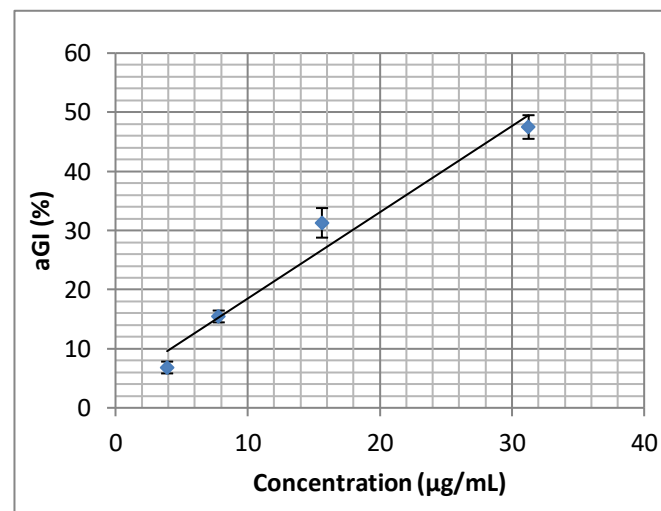

Figure S25. IC<sub>50</sub> plots for compound 11: Schweinfurthanol 9-O-β-D-pyranoglucoside

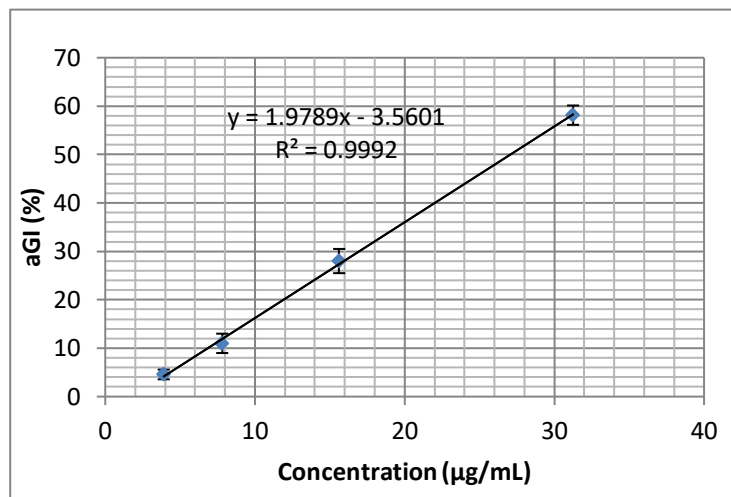

Figure S26. IC<sub>50</sub> plots for compound 12: 1-O-(3-Methyl)-butenoyl-myo-inositol

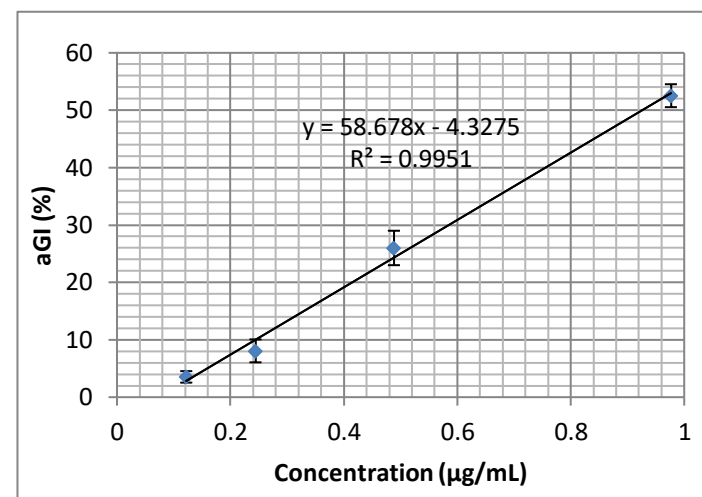

Figure S27. IC<sub>50</sub> plots for compound 14: Leonuriside

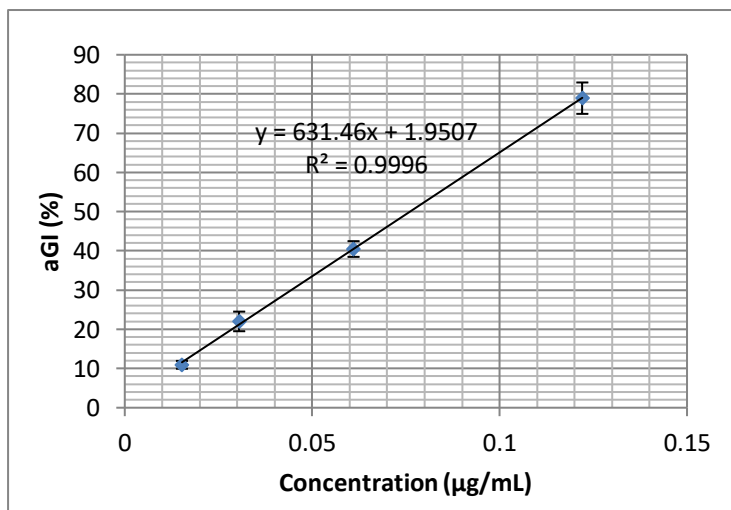

Figure S28. IC<sub>50</sub> plots for compound 18: Condensed tannin-ELCTB-3.1

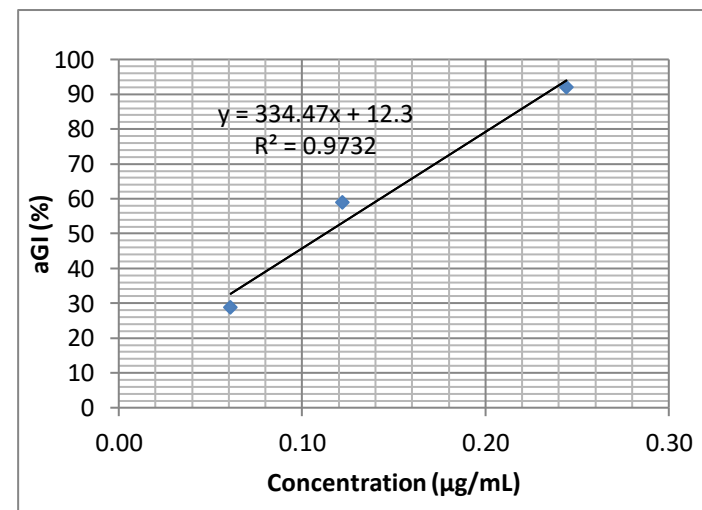

Figure S29. IC<sub>50</sub> plots for compound 19: (+)-Catechin

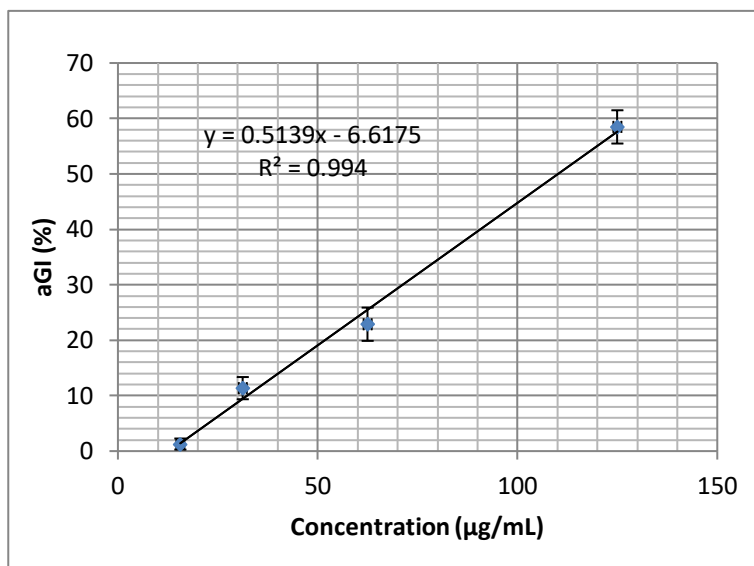

Figure S30. IC<sub>50</sub> plots for compound 20: Methyl galloate

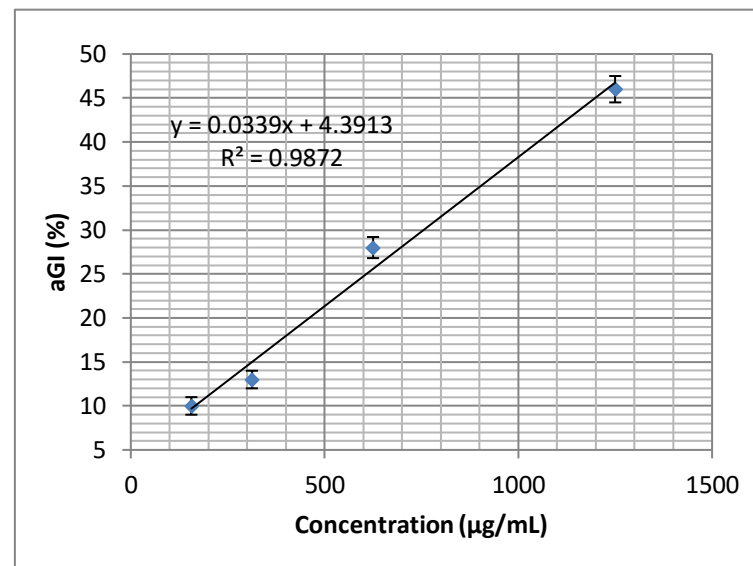

Figure S31. IC<sub>50</sub> plots for acarbose

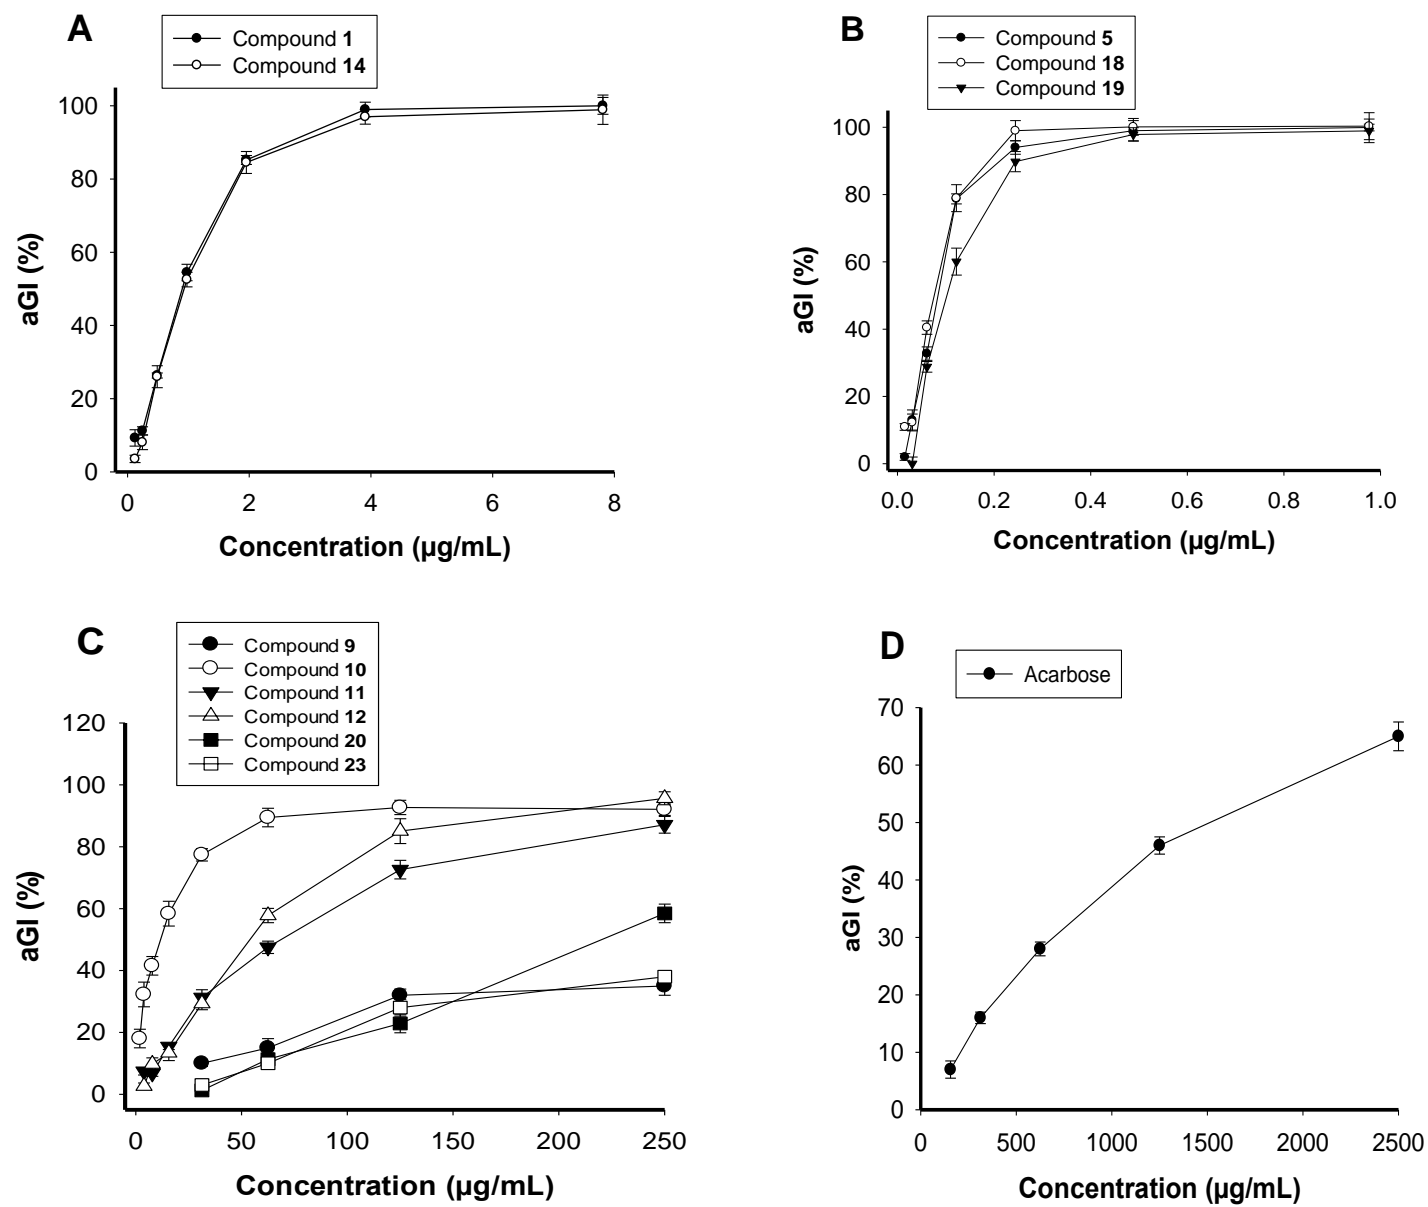

**Figure S32.** The corresponding % inhibition at each concentration of compounds 1 and 14 (A), compounds 5, 18 and 19 (B), compounds 9, 10, 11, 12, 20 and 23 (C), and acarbose (D).
